# Supplementary material
Source: HighWire-hosted journal article supplement (https://tobaccocontrol.bmj.com/highwire/filestream/166607/field_highwire_adjunct_files/0/tc-2022-057786supp001_data_supplement.pdf)
Supplement: tc-2022-057786supp001_data_supplement.pdf [file tc-2022-057786supp001_data_supplement.pdf]

Table S1. COICOP classifications of commodities used in the analysis

| Commodities                   | Description                                                                                                       |
|-------------------------------|-------------------------------------------------------------------------------------------------------------------|
| Tobacco                       | Tobacco (COICOP group 2.3)                                                                                        |
| Food and non-alcoholic        | Food and non-alcoholic beverages (COICOP group 1)                                                                 |
| Cereals                       | Cereals and cereal products (COICOP group 1.1.1)                                                                  |
| Meat                          | Live animals, meat, and other parts of slaughtered land animals (COICOP group 1.1.2)                              |
| Fish                          | Fish and other seafood (COICOP group 1.1.3)                                                                       |
| Milk                          | Raw, whole, Skimmed, non-animal, and other milk (COICOP group 1.1.4.1 - 1.1.4.4)                                  |
| Other dairy products          | Cheese, yogurt, milk-based dessert and beverages, eggs, and other dairy products (COICOP group 1.1.4.6 - 1.1.4.9) |
| Oils and fats                 | Oils and fats (COICOP group 1.1.5)                                                                                |
| Fruits and vegetables         | Fruits and nuts (COICOP group 1.1.6) and                                                                          |
| Desserts                      | Sugar, confectionary, and desserts (COICOP group 1.1.8)                                                           |
| Ready-made food               | Ready-made food and other food products (COICOP group 1.1.9)                                                      |
| Coffee and tea                | Coffee, tea, and cocoa drinks (COICOP group 1.2.1)                                                                |
| Other non-alcoholic beverages | Water, non-alcoholic beverages, fruit and vegetable juice, and soft drinks (COICOP group 1.2.2)                   |
| Clothes                       | Clothing and footwear (COICOP group 3)                                                                            |
| Housing and utilities         | Housing, water, electricity, gas, and other fuels (COICOP group 4)                                                |
| Furniture                     | Furnishings, household equipment, and routine household maintenance (COICOP group 5)                              |
| Health                        | Health (COICOP group 6)                                                                                           |
| Transportation                | Transport (COICOP group 7)                                                                                        |
| Communication                 | Information and communication (COICOP group 8)                                                                    |
| Recreation and culture        | Recreation, sport and culture (COICOP group 9)                                                                    |
| Education                     | Education services (COICOP group 10)                                                                              |
| Bars, restaurants and hotels  | Restaurants and accommodation services (COICOP group 11)                                                          |
| Alcohol                       | Alcoholic beverages (COICOP group 2.1)                                                                            |

Table S2. Budget shares spent on different groups of products by smoking and non-smoking households – by income groups

| Low-income household             | Households without smokers | Households with smokers | Difference | t-stat     |
|----------------------------------|----------------------------|-------------------------|------------|------------|
| Tobacco                          | 0.0%                       | 5.6%                    | -5.6%      | -50.140*** |
| Food and non-alcoholic beverages | 49.9%                      | 47.7%                   | 2.3%       | 3.585***   |
| Cereals                          | 8.0%                       | 7.8%                    | 0.2%       | 1.365      |
| Meat                             | 11.3%                      | 11.2%                   | 0.1%       | 0.353      |
| Fish                             | 1.0%                       | 0.9%                    | 0.1%       | 1.588      |
| Milk                             | 5.0%                       | 4.4%                    | 0.6%       | 4.038***   |
| Other dairy products             | 9.0%                       | 8.1%                    | 0.8%       | 4.745***   |
| Oils and fats                    | 1.7%                       | 1.6%                    | 0.1%       | 2.109**    |
| Fruits and vegetables            | 7.8%                       | 7.6%                    | 0.2%       | 1.457      |
| Desserts                         | 1.9%                       | 2.0%                    | -0.1%      | -1.428     |
| Ready-made food                  | 1.1%                       | 1.2%                    | 0.0%       | -0.555     |
| Coffee and tea                   | 1.2%                       | 1.2%                    | 0.0%       | 1.246      |
| Other non-alcoholic beverages    | 1.2%                       | 1.2%                    | 0.0%       | 0.384      |
| Clothes                          | 4.5%                       | 4.7%                    | -0.2%      | -1.036     |
| Housing and utilities            | 23.2%                      | 19.5%                   | 3.7%       | 7.187***   |
| Furniture                        | 2.9%                       | 2.9%                    | -0.1%      | -0.650     |
| Health                           | 1.9%                       | 1.6%                    | 0.3%       | 2.819***   |
| Transportation                   | 6.0%                       | 5.7%                    | 0.2%       | 1.086      |
| Communication                    | 4.2%                       | 4.2%                    | 0.0%       | 0.380      |
| Recreation and culture           | 1.6%                       | 1.8%                    | -0.3%      | -2.373**   |
| Education                        | 0.6%                       | 0.4%                    | 0.2%       | 1.756*     |
| Bars, restaurants and hotels     | 0.8%                       | 0.9%                    | -0.1%      | -1.273**   |
| Alcohol                          | 1.1%                       | 1.4%                    | -0.3%      | -3.685***  |
| Other                            | 3.3%                       | 3.5%                    | -0.2%      | -1.614     |
| Middle-income household          | Households without smokers | Households with smokers | Difference | t-stat     |
| Tobacco                          | 0.0%                       | 4.4%                    | -4.4%      | -62.184*** |
| Food and non-alcoholic beverages | 34.6%                      | 34.5%                   | 0.1%       | 0.195      |
| Cereals                          | 5.1%                       | 5.1%                    | 0.0%       | 0.353      |
| Meat                             | 8.8%                       | 9.8%                    | -1.1%      | -5.961***  |
| Fish                             | 0.9%                       | 0.8%                    | 0.0%       | 0.025      |
| Milk                             | 2.3%                       | 2.1%                    | 0.2%       | 2.900***   |
| Other dairy products             | 6.0%                       | 5.7%                    | 0.2%       | 1.916**    |
| Oils and fats                    | 1.1%                       | 1.0%                    | 0.1%       | 3.182***   |
| Fruits and vegetables            | 5.9%                       | 5.5%                    | 0.4%       | 3.656***   |
| Desserts                         | 1.5%                       | 1.5%                    | 0.1%       | 1.460      |

|                                  |                                   |                                |                   |               |
|----------------------------------|-----------------------------------|--------------------------------|-------------------|---------------|
| Ready-made food                  | 0.8%                              | 0.8%                           | 0.0%              | 0.499         |
| Coffee and tea                   | 0.9%                              | 0.8%                           | 0.0%              | 1.496         |
| Other non-alcoholic beverages    | 0.9%                              | 1.0%                           | -0.1%             | -2.527**      |
| Clothes                          | 5.6%                              | 6.0%                           | -0.4%             | -2.488**      |
| Housing and utilities            | 32.3%                             | 26.4%                          | 5.9%              | 14.480***     |
| Furniture                        | 3.0%                              | 3.4%                           | -0.4%             | -3.619***     |
| Health                           | 3.2%                              | 2.3%                           | 0.9%              | 6.393***      |
| Transportation                   | 7.3%                              | 7.8%                           | -0.6%             | -3.120***     |
| Communication                    | 4.7%                              | 4.5%                           | 0.2%              | 2.442**       |
| Recreation and culture           | 2.2%                              | 2.5%                           | -0.2%             | -2.481**      |
| Education                        | 1.1%                              | 1.1%                           | 0.0%              | 0.343         |
| Bars, restaurants and hotels     | 1.5%                              | 1.9%                           | -0.4%             | -4.999***     |
| Alcohol                          | 1.0%                              | 1.4%                           | -0.5%             | -8.422***     |
| Other                            | 3.5%                              | 3.8%                           | -0.3%             | -2.226**      |
| <b>High-income household</b>     | <b>Households without smokers</b> | <b>Households with smokers</b> | <b>Difference</b> | <b>t-stat</b> |
| Tobacco                          | 0.0%                              | 4.4%                           | -4.4%             | -49.521***    |
| Food and non-alcoholic beverages | 25.9%                             | 27.0%                          | -1.1%             | -2.397**      |
| Cereals                          | 3.7%                              | 3.7%                           | 0.0%              | 0.015         |
| Meat                             | 6.7%                              | 7.8%                           | -1.1%             | -5.513***     |
| Fish                             | 1.0%                              | 0.9%                           | 0.0%              | 0.623         |
| Milk                             | 1.2%                              | 1.2%                           | 0.1%              | 0.996         |
| Other dairy products             | 4.1%                              | 4.1%                           | 0.0%              | -0.183        |
| Oils and fats                    | 0.9%                              | 0.8%                           | 0.1%              | 4.813***      |
| Fruits and vegetables            | 4.8%                              | 4.5%                           | 0.2%              | 2.108**       |
| Desserts                         | 1.2%                              | 1.2%                           | 0.0%              | 0.554         |
| Ready-made food                  | 0.6%                              | 0.6%                           | 0.0%              | -1.943**      |
| Coffee and tea                   | 0.7%                              | 0.7%                           | 0.0%              | -0.059        |
| Other non-alcoholic beverages    | 0.8%                              | 0.9%                           | -0.1%             | -3.211***     |
| Clothes                          | 5.6%                              | 5.9%                           | -0.3%             | -1.858*       |
| Housing and utilities            | 38.1%                             | 29.9%                          | 8.3%              | 15.898***     |
| Furniture                        | 4.0%                              | 3.9%                           | 0.1%              | 0.691         |
| Health                           | 4.7%                              | 3.1%                           | 1.6%              | 8.336***      |
| Transportation                   | 6.9%                              | 8.5%                           | -1.7%             | -6.595***     |
| Communication                    | 4.4%                              | 4.2%                           | 0.2%              | 2.734***      |
| Recreation and culture           | 2.4%                              | 3.0%                           | -0.6%             | -5.093***     |
| Education                        | 1.1%                              | 1.2%                           | -0.1%             | -0.448        |
| Bars, restaurants and hotels     | 2.1%                              | 2.9%                           | -0.8%             | -5.463***     |
| Alcohol                          | 0.8%                              | 1.4%                           | -0.5%             | -9.078***     |
| Other                            | 3.8%                              | 4.6%                           | -0.8%             | -3.003***     |

Table S3. Test of Instrumental variables validity for whole sample and by income groups

| Whole sample                     | Pagan-Hall test statistics | p - value | Kleibergen-Paap rk LM-test | p - value | Hansen J | p - value | GMM C statistic | p - value | Wald test | p - value |
|----------------------------------|----------------------------|-----------|----------------------------|-----------|----------|-----------|-----------------|-----------|-----------|-----------|
| Food and non-alcoholic beverages |                            |           |                            |           |          |           |                 |           |           |           |
| Cereals                          | 1114.664                   | 0.000     | 420.421                    | 0.000     | 0.203    | 0.652     | 10.745          | 0.013     | 27.070    | 0.000     |
| Meat                             | 188.474                    | 0.000     | 217.045                    | 0.000     | 2.518    | 0.113     | 79.681          | 0.000     | 51.599    | 0.000     |
| Fish                             | 75.921                     | 0.000     | 217.045                    | 0.000     | 1.071    | 0.301     | 7.283           | 0.006     | 2.829     | 0.002     |
| Milk                             | 439.589                    | 0.000     | 217.045                    | 0.000     | 2.864    | 0.091     | 57.405          | 0.000     | 50.277    | 0.000     |
| Other dairy products             | 618.365                    | 0.000     | 217.045                    | 0.000     | 3.309    | 0.069     | 26.376          | 0.000     | 29.963    | 0.000     |
| Oils and fats                    | 425.377                    | 0.000     | 214.368                    | 0.000     | 24.217   | 0.079     | 20.983          | 0.000     | 23.796    | 0.000     |
| Fruits and vegetables            | 281.115                    | 0.000     | 217.045                    | 0.000     | 0.157    | 0.692     | 38.780          | 0.000     | 37.154    | 0.000     |
| Desserts                         | 53.092                     | 0.000     | 31.381                     | 0.000     | 1.722    | 0.189     | 26.670          | 0.000     | 18.017    | 0.000     |
| Ready-made food                  | 135.432                    | 0.000     | 217.045                    | 0.000     | 0.097    | 0.756     | 2.261           | 0.045     | 3.839     | 0.009     |
| Coffee and tea                   | 561.908                    | 0.000     | 420.421                    | 0.000     | 3.718    | 0.054     | 22.007          | 0.000     | 23.416    | 0.000     |
| Other non-alcoholic beverages    | 57.692                     | 0.000     | 29.746                     | 0.000     | 2.484    | 0.115     | 30.437          | 0.000     | 20.584    | 0.000     |
| Clothes                          | 173.914                    | 0.000     | 223.585                    | 0.000     | 0.207    | 0.649     | 52.482          | 0.000     | 37.580    | 0.000     |
| Housing and utilities            | 5.783                      | 0.016     | 29.821                     | 0.000     | 0.295    | 0.587     | 64.307          | 0.000     | 25.067    | 0.000     |
| Furniture                        | 33.845                     | 0.000     | 29.746                     | 0.000     | 0.086    | 0.770     | 11.439          | 0.010     | 7.698     | 0.049     |
| Health                           | 110.914                    | 0.000     | 21.229                     | 0.000     | 0.022    | 0.882     | 9.168           | 0.027     | 9.135     | 0.028     |
| Transportation                   | 9.421                      | 0.002     | 29.746                     | 0.000     | 0.014    | 0.904     | 164.687         | 0.000     | 25.340    | 0.000     |
| Communication                    | 70.203                     | 0.000     | 223.585                    | 0.000     | 0.557    | 0.456     | 82.925          | 0.000     | 52.805    | 0.000     |
| Recreation and culture           | 6.893                      | 0.009     | 26.256                     | 0.000     | 4.725    | 0.659     | 87.453          | 0.000     | 18.057    | 0.000     |
| Education                        | 725.426                    | 0.000     | 214.368                    | 0.000     | 0.003    | 0.953     | 26.176          | 0.000     | 25.811    | 0.000     |
| Bars, restaurants and hotels     | 10.219                     | 0.001     | 29.746                     | 0.000     | 2.354    | 0.125     | 297.372         | 0.000     | 32.625    | 0.000     |
| Alcohol                          | 152.910                    | 0.000     | 214.368                    | 0.000     | 0.047    | 0.829     | 167.971         | 0.000     | 123.853   | 0.000     |
| Low-income                       | Pagan-Hall test statistics | p - value | Kleibergen-Paap rk LM-test | p - value | Hansen J | p - value | GMM C statistic | p - value | Wald test | p - value |
| Food and non-alcoholic beverages |                            |           |                            |           |          |           |                 |           |           |           |
| Cereals                          | 48.064                     | 0.000     | 68.926                     | 0.000     | 1.428    | 0.490     | 7.615           | 0.055     | 6.511     | 0.009     |
| Meat                             | 114.030                    | 0.000     | 68.825                     | 0.000     | 0.551    | 0.458     | 8.265           | 0.041     | 3.132     | 0.027     |
| Fish                             | 119.631                    | 0.000     | 68.825                     | 0.000     | 0.705    | 0.401     | 11.239          | 0.011     | 10.280    | 0.016     |
| Milk                             | 32.845                     | 0.000     | 68.926                     | 0.000     | 5.172    | 0.075     | 18.122          | 0.000     | 20.330    | 0.000     |
| Other dairy products             | 27.635                     | 0.000     | 68.825                     | 0.000     | 0.124    | 0.725     | 12.548          | 0.006     | 13.987    | 0.003     |

|                                  |                                   |                  |                                   |                  |                 |                  |                        |                  |                  |                  |
|----------------------------------|-----------------------------------|------------------|-----------------------------------|------------------|-----------------|------------------|------------------------|------------------|------------------|------------------|
| Oils and fats                    | 14.521                            | 0.000            | 23.402                            | 0.000            | 0.307           | 0.579            | 12.088                 | 0.007            | 8.606            | 0.035            |
| Fruits and vegetables            | 71.217                            | 0.000            | 19.248                            | 0.000            | 1.176           | 0.278            | 12.165                 | 0.007            | 7.486            | 0.046            |
| Desserts                         | 14.721                            | 0.000            | 68.825                            | 0.000            | 2.494           | 0.114            | 18.195                 | 0.000            | 12.967           | 0.005            |
| Ready-made food                  | 84.573                            | 0.000            | 68.825                            | 0.000            | 0.208           | 0.648            | 13.743                 | 0.003            | 20.951           | 0.000            |
| Coffee and tea                   | 85.146                            | 0.000            | 68.825                            | 0.000            | 2.616           | 0.106            | 3.396                  | 0.033            | 2.700            | 0.044            |
| Other non-alcoholic beverages    | 64.884                            | 0.000            | 68.825                            | 0.000            | 0.717           | 0.397            | 9.040                  | 0.029            | 8.821            | 0.032            |
| Clothes                          | 35.911                            | 0.000            | 96.065                            | 0.000            | 1.428           | 0.232            | 45.050                 | 0.000            | 37.664           | 0.000            |
| Housing and utilities            | 0.017                             | 0.009            | 21.916                            | 0.000            | 2.883           | 0.290            | 15.008                 | 0.002            | 11.231           | 0.011            |
| Furniture                        | 7.855                             | 0.005            | 9.912                             | 0.007            | 0.489           | 0.484            | 18.991                 | 0.000            | 9.035            | 0.029            |
| Health                           | 93.562                            | 0.000            | 9.357                             | 0.009            | 0.034           | 0.854            | 10.526                 | 0.015            | 8.380            | 0.039            |
| Transportation                   | 8.616                             | 0.003            | 22.371                            | 0.000            | 0.421           | 0.516            | 12.413                 | 0.006            | 7.478            | 0.048            |
| Communication                    | 8.995                             | 0.003            | 22.371                            | 0.000            | 0.452           | 0.501            | 23.085                 | 0.000            | 12.276           | 0.006            |
| Recreation and culture           | 25.051                            | 0.000            | 96.065                            | 0.000            | 0.348           | 0.555            | 20.902                 | 0.000            | 21.464           | 0.000            |
| Education                        | 102.456                           | 0.000            | 96.065                            | 0.000            | 0.026           | 0.872            | 6.672                  | 0.043            | 5.530            | 0.014            |
| Bars, restaurants and hotels     | 0.010                             | 0.009            | 12.397                            | 0.002            | 0.662           | 0.416            | 52.596                 | 0.000            | 9.677            | 0.022            |
| Alcohol                          | 5.934                             | 0.015            | 17.052                            | 0.000            | 0.340           | 0.560            | 48.745                 | 0.000            | 14.866           | 0.002            |
| <b>Middle-income</b>             | <b>Pagan-Hall test statistics</b> | <b>p - value</b> | <b>Kleibergen-Paap rk LM-test</b> | <b>p - value</b> | <b>Hansen J</b> | <b>p - value</b> | <b>GMM C statistic</b> | <b>p - value</b> | <b>Wald test</b> | <b>p - value</b> |
| Food and non-alcoholic beverages |                                   |                  |                                   |                  |                 |                  |                        |                  |                  |                  |
| Cereals                          | 77.547                            | 0.000            | 36.233                            | 0.000            | 3.830           | 0.050            | 26.206                 | 0.000            | 13.960           | 0.003            |
| Meat                             | 31.766                            | 0.000            | 98.988                            | 0.000            | 3.805           | 0.051            | 108.104                | 0.000            | 51.038           | 0.000            |
| Fish                             | 12.053                            | 0.001            | 166.308                           | 0.000            | 0.287           | 0.592            | 4.811                  | 0.186            | 6.400            | 0.094            |
| Milk                             | 84.915                            | 0.000            | 98.988                            | 0.000            | 0.953           | 0.329            | 30.959                 | 0.000            | 23.836           | 0.000            |
| Other dairy products             | 94.156                            | 0.000            | 98.988                            | 0.000            | 0.682           | 0.409            | 28.122                 | 0.000            | 26.919           | 0.000            |
| Oils and fats                    | 122.929                           | 0.000            | 98.988                            | 0.000            | 0.440           | 0.507            | 7.627                  | 0.034            | 9.526            | 0.023            |
| Fruits and vegetables            | 125.274                           | 0.000            | 98.988                            | 0.000            | 1.304           | 0.253            | 19.545                 | 0.000            | 18.116           | 0.000            |
| Desserts                         | 2.472                             | 0.116            | 15.627                            | 0.000            | 2.510           | 0.113            | 68.288                 | 0.000            | 9.235            | 0.026            |
| Ready-made food                  | 153.380                           | 0.000            | 166.308                           | 0.000            | 13.155          | 0.287            | 11.931                 | 0.008            | 12.848           | 0.005            |
| Coffee and tea                   | 57.388                            | 0.000            | 98.988                            | 0.000            | 2.481           | 0.115            | 11.024                 | 0.012            | 11.597           | 0.009            |
| Other non-alcoholic beverages    | 14.827                            | 0.000            | 41.260                            | 0.000            | 0.050           | 0.823            | 7.626                  | 0.054            | 11.301           | 0.010            |
| Clothes                          | 45.435                            | 0.000            | 96.242                            | 0.000            | 0.213           | 0.644            | 36.317                 | 0.000            | 22.416           | 0.000            |
| Housing and utilities            | 4.882                             | 0.027            | 107.950                           | 0.000            | 2.080           | 0.149            | 69.549                 | 0.000            | 48.126           | 0.000            |
| Furniture                        | 124.269                           | 0.000            | 45.117                            | 0.000            | 0.223           | 0.637            | 23.364                 | 0.000            | 12.112           | 0.007            |
| Health                           | 127.132                           | 0.000            | 43.370                            | 0.000            | 0.110           | 0.740            | 16.817                 | 0.001            | 9.221            | 0.026            |

|                                  |                                   |                  |                                   |                  |                 |                  |                        |                  |                  |                  |
|----------------------------------|-----------------------------------|------------------|-----------------------------------|------------------|-----------------|------------------|------------------------|------------------|------------------|------------------|
| Transportation                   | 6.494                             | 0.011            | 45.117                            | 0.000            | 2.462           | 0.117            | 48.990                 | 0.000            | 20.211           | 0.000            |
| Communication                    | 33.557                            | 0.000            | 96.242                            | 0.000            | 3.475           | 0.062            | 30.182                 | 0.000            | 20.074           | 0.000            |
| Recreation and culture           | 5.553                             | 0.018            | 14.141                            | 0.001            | 1.189           | 0.275            | 28.815                 | 0.000            | 12.065           | 0.007            |
| Education                        | 219.993                           | 0.000            | 96.242                            | 0.000            | 0.107           | 0.743            | 14.384                 | 0.002            | 11.228           | 0.011            |
| Bars, restaurants and hotels     | 4.105                             | 0.043            | 43.370                            | 0.000            | 0.720           | 0.396            | 95.872                 | 0.000            | 31.552           | 0.000            |
| Alcohol                          | 60.011                            | 0.000            | 96.242                            | 0.000            | 2.881           | 0.090            | 77.174                 | 0.000            | 65.887           | 0.000            |
| <b>High-income</b>               | <b>Pagan-Hall test statistics</b> | <b>p - value</b> | <b>Kleibergen-Paap rk LM-test</b> | <b>p - value</b> | <b>Hansen J</b> | <b>p - value</b> | <b>GMM C statistic</b> | <b>p - value</b> | <b>Wald test</b> | <b>p - value</b> |
| Food and non-alcoholic beverages |                                   |                  |                                   |                  |                 |                  |                        |                  |                  |                  |
| Cereals                          | 2.020                             | 0.155            | 51.245                            | 0.000            | 0.859           | 0.354            | 27.002                 | 0.000            | 18.301           | 0.000            |
| Meat                             | 71.422                            | 0.000            | 86.415                            | 0.000            | 0.528           | 0.467            | 28.482                 | 0.000            | 26.701           | 0.000            |
| Fish                             | 8.405                             | 0.004            | 25.758                            | 0.000            | 0.880           | 0.348            | 12.032                 | 0.007            | 10.467           | 0.015            |
| Milk                             | 22.944                            | 0.000            | 51.245                            | 0.000            | 1.993           | 0.158            | 27.083                 | 0.000            | 19.082           | 0.000            |
| Other dairy products             | 31.637                            | 0.000            | 51.245                            | 0.000            | 2.678           | 0.102            | 41.884                 | 0.000            | 33.508           | 0.000            |
| Oils and fats                    | 0.697                             | 0.404            | 12.403                            | 0.002            | 0.123           | 0.726            | 21.388                 | 0.000            | 7.991            | 0.046            |
| Fruits and vegetables            | 11.401                            | 0.001            | 51.245                            | 0.000            | 0.141           | 0.707            | 15.934                 | 0.001            | 13.859           | 0.003            |
| Desserts                         | 1.454                             | 0.023            | 12.403                            | 0.002            | 1.865           | 0.172            | 49.362                 | 0.000            | 9.498            | 0.023            |
| Ready-made food                  | 106.758                           | 0.000            | 51.245                            | 0.000            | 3.327           | 0.168            | 9.655                  | 0.022            | 15.713           | 0.001            |
| Coffee and tea                   | 70.446                            | 0.000            | 86.415                            | 0.000            | 1.834           | 0.176            | 10.464                 | 0.015            | 9.722            | 0.021            |
| Other non-alcoholic beverages    | 25.155                            | 0.000            | 25.758                            | 0.000            | 1.008           | 0.315            | 16.566                 | 0.001            | 11.392           | 0.010            |
| Clothes                          | 5.749                             | 0.017            | 17.227                            | 0.000            | 0.007           | 0.931            | 13.716                 | 0.003            | 8.028            | 0.045            |
| Housing and utilities            | 4.037                             | 0.045            | 102.957                           | 0.000            | 2.065           | 0.151            | 75.804                 | 0.000            | 65.337           | 0.000            |
| Furniture                        | 109.384                           | 0.000            | 102.957                           | 0.000            | 0.148           | 0.700            | 21.297                 | 0.000            | 8.231            | 0.041            |
| Health                           | 18.205                            | 0.000            | 63.866                            | 0.000            | 0.264           | 0.608            | 8.109                  | 0.044            | 13.349           | 0.004            |
| Transportation                   | 94.633                            | 0.000            | 63.866                            | 0.000            | 0.017           | 0.896            | 24.460                 | 0.000            | 24.316           | 0.000            |
| Communication                    | 16.671                            | 0.000            | 102.957                           | 0.000            | 1.332           | 0.249            | 32.107                 | 0.000            | 19.624           | 0.000            |
| Recreation and culture           | 68.285                            | 0.000            | 108.837                           | 0.000            | 0.110           | 0.740            | 18.981                 | 0.000            | 12.538           | 0.006            |
| Education                        | 315.062                           | 0.000            | 63.866                            | 0.000            | 0.047           | 0.828            | 8.063                  | 0.045            | 9.800            | 0.020            |
| Bars, restaurants and hotels     | 62.792                            | 0.000            | 63.866                            | 0.000            | 0.844           | 0.358            | 16.613                 | 0.001            | 23.476           | 0.000            |
| Alcohol                          | 83.514                            | 0.000            | 92.711                            | 0.000            | 1.690           | 0.194            | 31.563                 | 0.000            | 59.736           | 0.000            |

Note: adult share – share of adults out of total households members; aseratio – ratio of male to female adults in household; madultshare - share of male adults out of total households members; lnX – log of total tobacco expenditures; lnX2 – log of total tobacco expenditures squared; s\_prev – prevalence by municipality (18+); cig\_intensity - average number of cigarettes smoked monthly by municipality (18+)

Table S4. Estimation results: whole sample

| VARIABLES                     | Cereals                  | Meat                     | Fish                     | Milk                     | Other dairy products     | Oils and fats            | Fruits and vegetables    | Desserts                 | Ready-made food          | Coffee and tea           | Other non-alcoholic beverages | Clothes                  | Housing                  | Furniture                | Health                   | Transportation           | Communication            | Recreation               | Education                | Bars and restaurants     | Alcohol                  |
|-------------------------------|--------------------------|--------------------------|--------------------------|--------------------------|--------------------------|--------------------------|--------------------------|--------------------------|--------------------------|--------------------------|-------------------------------|--------------------------|--------------------------|--------------------------|--------------------------|--------------------------|--------------------------|--------------------------|--------------------------|--------------------------|--------------------------|
| exptob                        | -0.00010***<br>(0.00001) | 0.00019***<br>(0.00004)  | 0.00001<br>(0.00001)     | 0.00005***<br>(0.00001)  | -0.00008***<br>(0.00002) | 0.00000<br>(0.00000)     | 0.00005***<br>(0.00002)  | -0.00000<br>(0.00001)    | -0.00000<br>(0.00000)    | 0.00002***<br>(0.00001)  | 0.00022***<br>(0.00003)       | -0.00009***<br>(0.00001) | -0.00036***<br>(0.00002) | -0.00004**<br>(0.00002)  | -0.00002<br>(0.00002)    | -0.00002<br>(0.00002)    | 0.00003<br>(0.00003)     | -0.00001<br>(0.00003)    | -0.00014***<br>(0.00002) | 0.00005***<br>(0.00002)  | 0.00009***<br>(0.00002)  |
| lnM                           | -0.14661***<br>(0.01714) | 0.02078<br>(0.01990)     | -0.00182<br>(0.00452)    | -0.06049***<br>(0.01551) | 0.07285***<br>(0.01427)  | -0.0582<br>(0.0383)      | -0.00375<br>(0.01228)    | 0.00777<br>(0.00447)     | 0.00240<br>(0.00330)     | 0.01724***<br>(0.00376)  | -0.03934***<br>(0.00410)      | 0.03945<br>(0.01158)     | -0.01536<br>(0.03455)    | -0.02319<br>(0.00969)    | -0.04435<br>(0.01869)    | -0.02333<br>(0.02033)    | 0.07315**<br>(0.00622)   | -0.02340***<br>(0.00736) | -0.10651***<br>(0.01569) | -0.04587***<br>(0.00998) | 0.01254**<br>(0.00487)   |
| lnM2                          | 0.00080***<br>(0.00133)  | -0.00234<br>(0.00158)    | 0.00016<br>(0.00036)     | 0.00305**<br>(0.00122)   | 0.00340***<br>(0.00112)  | 0.00004<br>(0.00030)     | -0.00092<br>(0.00096)    | -0.00086**<br>(0.00036)  | -0.00046*<br>(0.00026)   | 0.00088**<br>(0.00029)   | 0.00099**<br>(0.00032)        | 0.00053**<br>(0.00028)   | -0.04518***<br>(0.00078) | 0.00249**<br>(0.00081)   | 0.00255<br>(0.00159)     | 0.00555**<br>(0.00174)   | -0.00582***<br>(0.00049) | 0.00291**<br>(0.00063)   | 0.00983**<br>(0.00120)   | 0.00462**<br>(0.00086)   | -0.00069*<br>(0.00038)   |
| tob                           | -0.04018***<br>(0.00681) | -0.08420***<br>(0.02218) | -0.00353<br>(0.01304)    | 0.02749**<br>(0.00915)   | -0.09515*<br>(0.04978)   | 0.03124<br>(0.02104)     | -0.03875**<br>(0.01177)  | 0.00914<br>(0.02003)     | 0.03159<br>(0.02266)     | 0.00509*<br>(0.02065)    | 0.03424*<br>(0.00943)         | -0.25621***<br>(0.08229) | 0.18011**<br>(0.00925)   | -0.02147**<br>(0.00750)  | -0.05439<br>(0.011217)   | -0.09906<br>(0.03717)    | 0.01091<br>(0.00599)     | -0.00309<br>(0.00987)    | -0.00105*<br>(0.00598)   | -0.16313***<br>(0.00987) | 0.08345**<br>(0.00372)   |
| tob*lnM                       | 0.01518<br>(0.02131)     | 0.02902<br>(0.01598)     | 0.00181<br>(0.00699)     | -0.00958<br>(0.02044)    | -0.02866<br>(0.01219)    | -0.00953<br>(0.00655)    | -0.01185<br>(0.01786)    | -0.00321<br>(0.00629)    | -0.00980<br>(0.00552)    | -0.00121<br>(0.00568)    | 0.01062*<br>(0.00528)         | 0.08275**<br>(0.01948)   | -0.07700<br>(0.05204)    | 0.00728<br>(0.01528)     | 0.01638<br>(0.02451)     | -0.03700<br>(0.03757)    | -0.00010<br>(0.01165)    | 0.03299<br>(0.01554)     | -0.00010<br>(0.02243)    | 0.03450<br>(0.01323)     | -0.02063*<br>(0.01150)   |
| tob*lnM2                      | -0.00340<br>(0.00166)    | -0.00238<br>(0.00253)    | -0.00020<br>(0.00055)    | 0.00076<br>(0.00159)     | 0.00212<br>(0.00172)     | 0.00072<br>(0.00051)     | -0.00088<br>(0.00139)    | 0.00029<br>(0.00049)     | 0.00077<br>(0.00054)     | 0.00007<br>(0.00043)     | -0.00085<br>(0.00044)         | 0.00734**<br>(0.00159)   | -0.00085<br>(0.00410)    | -0.00129<br>(0.00126)    | -0.00265<br>(0.00203)    | 0.00027<br>(0.00312)     | 0.00001<br>(0.00091)     | 0.00012<br>(0.00128)     | -0.00049<br>(0.00190)    | -0.00379***<br>(0.00109) | 0.00123**<br>(0.00089)   |
| household size                | 0.00732***<br>(0.00034)  | 0.00536***<br>(0.00025)  | 0.00043***<br>(0.00011)  | 0.00516***<br>(0.00025)  | 0.00625***<br>(0.00031)  | 0.00129***<br>(0.00009)  | 0.00379***<br>(0.00029)  | 0.00051***<br>(0.00011)  | 0.00034***<br>(0.00007)  | 0.00048***<br>(0.00008)  | -0.00006<br>(0.00006)         | -0.00292**<br>(0.00046)  | -0.01899***<br>(0.00093) | -0.00232***<br>(0.00030) | 0.00076*<br>(0.00030)    | -0.00002<br>(0.00053)    | -0.00016<br>(0.00005)    | -0.00192***<br>(0.00028) | 0.00251***<br>(0.00035)  | -0.00307***<br>(0.00026) | -0.00035**<br>(0.00016)  |
| mean age                      | -0.00033***<br>(0.00003) | 0.00017**<br>(0.00007)   | 0.00005***<br>(0.00002)  | 0.00000<br>(0.00003)     | 0.00022***<br>(0.00004)  | 0.00001<br>(0.00001)     | 0.00008**<br>(0.00004)   | -0.00012**<br>(0.00001)  | -0.00006**<br>(0.00001)  | 0.00003**<br>(0.00001)   | -0.00008**<br>(0.00001)       | -0.00081**<br>(0.00005)  | 0.00019***<br>(0.00013)  | 0.00017***<br>(0.00005)  | 0.00075***<br>(0.00005)  | -0.00034***<br>(0.00003) | -0.00005*<br>(0.00003)   | -0.00037***<br>(0.00004) | -0.00011***<br>(0.00003) | -0.00010***<br>(0.00003) | 0.00015***<br>(0.00002)  |
| max education                 | -0.00045***<br>(0.00015) | -0.00304***<br>(0.00007) | 0.00026***<br>(0.00015)  | -0.00141***<br>(0.00015) | -0.00233***<br>(0.00005) | -0.00024***<br>(0.00005) | -0.00036**<br>(0.00018)  | -0.00014**<br>(0.00007)  | -0.00020**<br>(0.00004)  | -0.00016**<br>(0.00003)  | 0.00005<br>(0.00005)          | 0.00120***<br>(0.00024)  | 0.00373***<br>(0.00057)  | -0.00032*<br>(0.00019)   | -0.00157**<br>(0.00023)  | 0.000081**<br>(0.00028)  | 0.00195***<br>(0.00013)  | 0.00143***<br>(0.00017)  | -0.00001<br>(0.00017)    | 0.00077***<br>(0.00015)  | -0.00071***<br>(0.00010) |
| economic activity - employed  | 0.00009<br>(0.00158)     | 0.00137<br>(0.00265)     | 0.00032<br>(0.00053)     | -0.00153<br>(0.00179)    | -0.00317<br>(0.00202)    | 0.00062<br>(0.00047)     | 0.00168<br>(0.00165)     | 0.00052<br>(0.00059)     | 0.00035<br>(0.00050)     | -0.00042<br>(0.00034)    | -0.00027<br>(0.00045)         | -0.01107***<br>(0.00201) | 0.03401***<br>(0.00551)  | -0.00088<br>(0.00153)    | 0.00802***<br>(0.00163)  | -0.15661***<br>(0.00213) | -0.00746***<br>(0.00103) | 0.00101<br>(0.00156)     | 0.00160<br>(0.00151)     | -0.00607***<br>(0.00088) | -0.00167*<br>(0.00094)   |
| economic activity - pensioner | 0.00135*<br>(0.00072)    | -0.00040<br>(0.01177)    | 0.00020<br>(0.00037)     | -0.00252***<br>(0.00076) | -0.00515***<br>(0.00107) | 0.00047**<br>(0.00028)   | 0.00086<br>(0.00093)     | 0.00122***<br>(0.00034)  | -0.00032<br>(0.00025)    | -0.00026<br>(0.00019)    | -0.00003<br>(0.00025)         | -0.00923***<br>(0.00121) | 0.03696***<br>(0.00309)  | -0.00031<br>(0.00097)    | 0.00964***<br>(0.00311)  | -0.02163***<br>(0.00147) | -0.00414***<br>(0.00070) | 0.00207***<br>(0.00072)  | 0.00437***<br>(0.00089)  | -0.00933***<br>(0.00057) | -0.00319***<br>(0.00059) |
| region - south                | -0.00020<br>(0.00024)    | -0.00042<br>(0.00015)    | 0.00117***<br>(0.00011)  | -0.00148***<br>(0.00024) | -0.00519***<br>(0.00009) | 0.00099***<br>(0.00024)  | -0.00201***<br>(0.00010) | -0.00007<br>(0.00007)    | -0.00043***<br>(0.00005) | -0.00032***<br>(0.00007) | -0.00044***<br>(0.00007)      | 0.00241***<br>(0.00089)  | -0.00078***<br>(0.00030) | 0.00273***<br>(0.00046)  | -0.00191***<br>(0.00021) | -0.00058***<br>(0.00023) | -0.00003<br>(0.00030)    | 0.00013<br>(0.00023)     | -0.00013<br>(0.00023)    | -0.00140***<br>(0.00012) |                          |
| region - north                | -0.00810***<br>(0.00036) | -0.00142**<br>(0.00069)  | -0.00230***<br>(0.00012) | 0.00691**<br>(0.00034)   | 0.00604***<br>(0.00045)  | 0.00150***<br>(0.00012)  | 0.00405***<br>(0.00043)  | -0.00009<br>(0.00015)    | -0.00010<br>(0.00011)    | 0.00008**<br>(0.00008)   | -0.00157**<br>(0.00010)       | 0.01306***<br>(0.00056)  | -0.01525***<br>(0.00125) | 0.00092**<br>(0.00038)   | -0.00337**<br>(0.00043)  | -0.00372***<br>(0.00057) | -0.00233***<br>(0.00028) | -0.00141***<br>(0.00030) | 0.00267***<br>(0.00043)  | 0.00161***<br>(0.00027)  | 0.00434**<br>(0.00044)   |
| number of children (age 0-2)  | -0.00417***<br>(0.00101) | -0.00131<br>(0.00201)    | -0.00054<br>(0.00039)    | 0.00515***<br>(0.00096)  | -0.00378***<br>(0.00115) | -0.00055*<br>(0.00030)   | 0.00070<br>(0.00109)     | -0.00035<br>(0.00037)    | 0.00491***<br>(0.00055)  | -0.00028<br>(0.00018)    | 0.00044<br>(0.00034)          | -0.00916**<br>(0.00154)  | 0.01322***<br>(0.00322)  | 0.00578**<br>(0.00111)   | 0.00304**<br>(0.00111)   | -0.00807***<br>(0.00179) | -0.00437***<br>(0.00073) | -0.00751***<br>(0.00088) | -0.01056***<br>(0.00075) | -0.00413***<br>(0.00054) | 0.00056<br>(0.00060)     |
| number of children (age 3-6)  | -0.00191**<br>(0.00081)  | 0.00465***<br>(0.00150)  | 0.00011<br>(0.00032)     | 0.00173***<br>(0.00071)  | -0.00279***<br>(0.00086) | -0.00011<br>(0.00029)    | -0.00003<br>(0.00079)    | 0.00269***<br>(0.00034)  | -0.00040*<br>(0.00023)   | 0.00001<br>(0.00015)     | 0.00046*<br>(0.00024)         | -0.00428***<br>(0.00120) | 0.01555***<br>(0.00244)  | 0.00268***<br>(0.00079)  | 0.00392***<br>(0.00082)  | -0.00551***<br>(0.00138) | -0.00403***<br>(0.00061) | -0.00181**<br>(0.00074)  | -0.01016***<br>(0.00060) | -0.00403***<br>(0.00046) | 0.00048<br>(0.00041)     |
| number of elderly 65+         | 0.00208***<br>(0.00050)  | 0.00156<br>(0.00116)     | -0.00006<br>(0.00027)    | 0.00360***<br>(0.00055)  | 0.00375***<br>(0.00072)  | 0.00029<br>(0.00020)     | 0.00147***<br>(0.00072)  | 0.00025*<br>(0.00025)    | 0.00032**<br>(0.00016)   | 0.00028<br>(0.00014)     | 0.00094<br>(0.00017)          | 0.00094<br>(0.00081)     | -0.01455***<br>(0.00223) | 0.00177**<br>(0.00072)   | 0.00257***<br>(0.00089)  | 0.00104<br>(0.00110)     | -0.00009<br>(0.00049)    | 0.00052<br>(0.00051)     | 0.00347***<br>(0.00056)  | -0.00122**<br>(0.00049)  | 0.00093**<br>(0.00043)   |
| y2                            | -0.02256***<br>(0.00138) | -0.05323***<br>(0.00307) | -0.00373***<br>(0.00072) | -0.00651***<br>(0.00132) | -0.02073***<br>(0.00186) | -0.00311***<br>(0.00052) | -0.02464***<br>(0.00194) | -0.00481***<br>(0.00065) | -0.00269***<br>(0.00043) | -0.00205***<br>(0.00032) | -0.00663***<br>(0.00047)      | 0.19790***<br>(0.00270)  | -0.01017***<br>(0.00047) | -0.01017***<br>(0.00021) | 0.00416**<br>(0.00089)   | 0.00030<br>(0.00110)     | -0.00491**<br>(0.00049)  | -0.00664***<br>(0.00051) | 0.00112<br>(0.00056)     | -0.00310*<br>(0.00049)   | -0.00637***<br>(0.00043) |
| y3                            | -0.01925***<br>(0.00160) | -0.04146***<br>(0.00350) | -0.00374***<br>(0.00083) | -0.00646***<br>(0.00139) | -0.01703***<br>(0.00196) | -0.00295***<br>(0.00058) | -0.00284***<br>(0.00224) | -0.00504***<br>(0.00071) | -0.00143***<br>(0.00055) | -0.00121***<br>(0.00038) | -0.00300***<br>(0.00059)      | -0.01354***<br>(0.00270) | 0.15787***<br>(0.00582)  | -0.00955***<br>(0.00235) | 0.00304<br>(0.00186)     | 0.00886***<br>(0.00293)  | -0.00737***<br>(0.00172) | -0.00427**<br>(0.00171)  | 0.00228*<br>(0.00139)    | 0.00089<br>(0.00189)     | 0.00489***<br>(0.00020)  |
| y4                            | -0.01910***<br>(0.00153) | -0.06268***<br>(0.00320) | -0.00512***<br>(0.00134) | -0.00421***<br>(0.00200) | -0.01470***<br>(0.00254) | -0.00121**<br>(0.00054)  | -0.00282***<br>(0.00199) | -0.00894***<br>(0.00063) | -0.00244***<br>(0.00046) | -0.00254***<br>(0.00034) | -0.00605***<br>(0.00052)      | 0.19470***<br>(0.00241)  | -0.01405***<br>(0.00211) | 0.00352*<br>(0.00196)    | 0.02457***<br>(0.00161)  | -0.00674***<br>(0.00185) | -0.00445**<br>(0.00127)  | 0.00077<br>(0.00185)     | 0.00287<br>(0.00127)     | 0.00287<br>(0.00193)     | -0.00879***<br>(0.00116) |
| y5                            | -0.02102***<br>(0.00152) | -0.04491**<br>(0.00353)  | -0.00493***<br>(0.00080) | -0.00352***<br>(0.00145) | -0.00989***<br>(0.00215) | -0.00445***<br>(0.00054) | -0.02168***<br>(0.00215) | -0.00685***<br>(0.00071) | -0.00174***<br>(0.00048) | -0.00194***<br>(0.00053) | -0.00511***<br>(0.00035)      | -0.01305**<br>(0.00269)  | 0.16979***<br>(0.00563)  | -0.01198**<br>(0.00231)  | 0.00358**<br>(0.00181)   | 0.00885***<br>(0.00283)  | -0.01323***<br>(0.00168) | -0.00502**<br>(0.00175)  | 0.00306**<br>(0.00129)   | 0.00057<br>(0.00186)     | -0.00688**<br>(0.00115)  |
| y6                            | -0.02338***<br>(0.00144) | -0.04901**<br>(0.00326)  | -0.00638***<br>(0.00068) | -0.00571***<br>(0.00129) | -0.01477***<br>(0.00203) | -0.00491***<br>(0.00053) | -0.03022***<br>(0.00192) | -0.00787***<br>(0.00063) | -0.00159***<br>(0.00046) | -0.00209**<br>(0.00047)  | -0.00620***<br>(0.00052)      | -0.01047**<br>(0.00256)  | 0.19531***<br>(0.00522)  | -0.02014***<br>(0.00216) | 0.00514***<br>(0.00185)  | 0.01320***<br>(0.00280)  | -0.00922***<br>(0.00157) | -0.00553***<br>(0.00175) | 0.00353**<br>(0.00137)   | -0.00003<br>(0.00187)    | -0.00827**<br>(0.00115)  |
| y7                            | -0.01729***<br>(0.00145) | -0.05860***<br>(0.00312) | -0.00632***<br>(0.00071) | -0.00887***<br>(0.00139) | -0.02247***<br>(0.00188) | -0.00276***<br>(0.00056) | -0.03042***<br>(0.00196) | -0.00681***<br>(0.00071) | -0.00224***<br>(0.00043) | -0.00159***<br>(0.00034) | -0.00606***<br>(0.00050)      | -0.00722***<br>(0.00261) | 0.19500***<br>(0.00475)  | -0.00706***<br>(0.00218) | 0.00822***<br>(0.00184)  | 0.02056***<br>(0.00277)  | -0.00587***<br>(0.00164) | -0.00760***<br>(0.00175) | 0.00249**<br>(0.00122)   | 0.00028<br>(0.00189)     | -0.01050***<br>(0.00039) |
| y8                            | -0.02028***<br>(0.00181) | -0.06806***<br>(0.00310) | -0.00705***<br>(0.00265) | -0.00367***<br>(0.00155) | -0.01246***<br>(0.00193) | -0.00434***<br>(0.00053) | -0.03797***<br>(0.00260) | -0.00852***<br>(0.00186) | -0.00325***<br>(0.00043) | -0.00149***<br>(0.00034) | -0.00678***<br>(0.00050)      | 0.19265***<br>(0.00276)  | -0.01894***<br>(0.00209) | -0.01087***              |                          |                          |                          |                          |                          |                          |                          |

Table S4a. Estimation results: Low-income group

| VARIABLES                     | Cereals                  | Meat                     | Fish                     | Milk                     | Other dairy products     | Oils and fats            | Fruits and vegetables    | Desserts                 | Ready-made food          | Coffee and tea           | Other non-alcoholic beverages | Clothes                  | Housing                  | Furniture               | Health                   | Transportation           | Communication            | Recreation               | Education                | Bars and restaurants     | Alcohol                 |                        |
|-------------------------------|--------------------------|--------------------------|--------------------------|--------------------------|--------------------------|--------------------------|--------------------------|--------------------------|--------------------------|--------------------------|-------------------------------|--------------------------|--------------------------|-------------------------|--------------------------|--------------------------|--------------------------|--------------------------|--------------------------|--------------------------|-------------------------|------------------------|
| exptob                        | -0.0029***<br>(0.00005)  | -0.0023***<br>(0.00002)  | -0.0002<br>(0.00004)     | 0.0009**<br>(0.00009)    | -0.0006<br>(0.00006)     | 0.0001<br>(0.00001)      | -0.0005<br>(0.00001)     | 0.0001<br>(0.00001)      | -0.0009<br>(0.00002)     | 0.0005<br>(0.00001)      | 0.0005**<br>(0.00001)         | -0.0023***<br>(0.00007)  | -0.0044***<br>(0.00013)  | -0.0091<br>(0.00004)    | 0.0039<br>(0.00004)      | -0.0005<br>(0.00008)     | 0.0005<br>(0.00005)      | -0.0006<br>(0.00003)     | -0.0006<br>(0.00003)     | -0.0002<br>(0.00003)     | -0.0002<br>(0.00003)    | 0.0007**<br>(0.00003)  |
| lnM                           | -0.12991***<br>(0.03866) | 0.08803*<br>(0.04809)    | -0.00479<br>(0.00987)    | 0.05987<br>(0.04115)     | 0.04910<br>(0.03367)     | 0.01222<br>(0.00934)     | 0.07420**<br>(0.02914)   | 0.00748<br>(0.01165)     | 0.01764**<br>(0.00637)   | -0.00078<br>(0.00864)    | -0.01495<br>(0.00974)         | -0.11160***<br>(0.02293) | 0.02192<br>(0.05985)     | 0.00341<br>(0.01533)    | 0.04847**<br>(0.01603)   | -0.05690**<br>(0.02401)  | 0.03237**<br>(0.01130)   | -0.04964**<br>(0.02401)  | -0.06188***<br>(0.01212) | -0.02659**<br>(0.00662)  | 0.03492**<br>(0.01019)  |                        |
| lnM2                          | 0.00588*<br>(0.00332)    | -0.00815*<br>(0.00421)   | 0.00044<br>(0.00086)     | -0.00777**<br>(0.00353)  | -0.00679**<br>(0.00292)  | -0.00164**<br>(0.00080)  | -0.00858***<br>(0.00252) | -0.00100<br>(0.00102)    | -0.00178***<br>(0.00055) | -0.00035<br>(0.00074)    | 0.00089<br>(0.00084)          | 0.01274***<br>(0.00209)  | 0.00249<br>(0.00531)     | -0.00004<br>(0.00141)   | -0.00353**<br>(0.00140)  | 0.00782***<br>(0.00221)  | -0.00167<br>(0.00103)    | 0.00543***<br>(0.00108)  | 0.00625***<br>(0.00115)  | 0.00281***<br>(0.00064)  | 0.00264***<br>(0.00089) |                        |
| tob                           | -0.19293**<br>(0.07587)  | 0.15833**<br>(0.05942)   | 0.04281<br>(0.05282)     | 0.00248<br>(0.15288)     | 0.18507<br>(0.15415)     | 0.02934<br>(0.15415)     | 0.11012<br>(0.13942)     | 0.07960<br>(0.04689)     | 0.00682**<br>(0.03165)   | -0.02454***<br>(0.00321) | 0.05056**<br>(0.01568)        | -0.52527*<br>(0.13241)   | -0.01229<br>(0.07369)    | -0.08468<br>(0.07980)   | -0.01153<br>(0.11990)    | 0.05739**<br>(0.02827)   | -0.03788**<br>(0.01816)  | -0.03788**<br>(0.01816)  | -0.03788**<br>(0.01816)  | -0.03788**<br>(0.01816)  | 0.01867<br>(0.04579)    | 0.19540**<br>(0.07920) |
| tob*lnM                       | 0.06518<br>(0.05157)     | -0.05991<br>(0.06826)    | -0.01473<br>(0.01795)    | -0.02737<br>(0.05205)    | -0.06417<br>(0.05205)    | -0.09040<br>(0.01656)    | -0.03969<br>(0.04446)    | 0.01191<br>(0.01666)     | -0.00259<br>(0.01718)    | 0.00217<br>(0.01352)     | -0.00705<br>(0.01416)         | -0.03470<br>(0.04123)    | 0.19512*<br>(0.10674)    | -0.02295<br>(0.02585)   | 0.02341<br>(0.02756)     | 0.01816<br>(0.04288)     | 0.01816<br>(0.02884)     | 0.01816<br>(0.02884)     | 0.01816<br>(0.02884)     | 0.01816<br>(0.02884)     | 0.01816<br>(0.02884)    | -0.06660<br>(0.01593)  |
| tob*lnM2                      | -0.00602<br>(0.00436)    | 0.00545<br>(0.00585)     | 0.00126<br>(0.00152)     | 0.00034<br>(0.00440)     | 0.00543<br>(0.00446)     | 0.00075<br>(0.00139)     | 0.00356<br>(0.00377)     | -0.00092<br>(0.00137)    | 0.00223<br>(0.00143)     | 0.00017<br>(0.00113)     | -0.00049<br>(0.00120)         | 0.00274<br>(0.00364)     | -0.01799*<br>(0.00909)   | -0.00013<br>(0.00226)   | -0.00150<br>(0.00237)    | -0.00237<br>(0.00380)    | -0.00189<br>(0.00242)    | 0.00191<br>(0.00200)     | -0.00183<br>(0.00164)    | 0.00069<br>(0.00139)     | 0.00511**<br>(0.00223)  |                        |
| household size                | 0.00976***<br>(0.00096)  | 0.00133<br>(0.00106)     | 0.00012<br>(0.00024)     | 0.00599***<br>(0.00067)  | 0.00542***<br>(0.00076)  | 0.00120***<br>(0.00020)  | 0.00381***<br>(0.00065)  | 0.00018<br>(0.00021)     | -0.00004<br>(0.00013)    | 0.00024*<br>(0.00017)    | -0.00028*<br>(0.00017)        | -0.00205**<br>(0.00089)  | -0.01738***<br>(0.00161) | -0.00072<br>(0.00044)   | 0.00076<br>(0.00076)     | -0.00251***<br>(0.00091) | -0.00184***<br>(0.00046) | -0.00169***<br>(0.00050) | 0.00055<br>(0.00034)     | -0.00025<br>(0.00038)    | 0.00082***<br>(0.00030) |                        |
| mean age                      | -0.00068***<br>(0.00009) | 0.00015<br>(0.00015)     | 0.00002<br>(0.00004)          | 0.00002<br>(0.00004)     | 0.00002<br>(0.00004)     | 0.00002<br>(0.00004)    | 0.00002<br>(0.00004)     | 0.00002<br>(0.00004)     | 0.00002<br>(0.00004)     | 0.00002<br>(0.00004)     | 0.00002<br>(0.00004)     | 0.00002<br>(0.00004)     | 0.00002<br>(0.00004)    | 0.00002<br>(0.00004)   |
| max education                 | -0.00043<br>(0.00041)    | -0.00036<br>(0.00061)    | 0.00061***<br>(0.00015)  | -0.00289***<br>(0.00037) | -0.00320***<br>(0.00043) | -0.00272**<br>(0.00012)  | 0.00008<br>(0.00041)     | 0.00002<br>(0.00015)     | -0.00017<br>(0.00010)    | -0.00021***<br>(0.00008) | 0.00026**<br>(0.00011)        | 0.00008<br>(0.00047)     | 0.00008<br>(0.00094)     | 0.00040<br>(0.00027)    | -0.00119***<br>(0.00003) | 0.00044<br>(0.00049)     | 0.00199**<br>(0.00029)   | 0.00088***<br>(0.00027)  | 0.00066***<br>(0.00024)  | 0.00098***<br>(0.00030)  | -0.00042**<br>(0.00019) |                        |
| economic activity - employed  | -0.00008<br>(0.00269)    | 0.00096<br>(0.00349)     | 0.00028<br>(0.00082)     | -0.00358<br>(0.00285)    | -0.00441<br>(0.00283)    | 0.00033<br>(0.00077)     | 0.00074<br>(0.00235)     | 0.00014<br>(0.00091)     | -0.00016<br>(0.00080)    | -0.00024<br>(0.00053)    | -0.00054<br>(0.00066)         | -0.00476*<br>(0.00279)   | 0.03528***<br>(0.00718)  | 0.00461***<br>(0.00167) | 0.00581***<br>(0.00185)  | -0.01411***<br>(0.00290) | -0.00543***<br>(0.00152) | 0.00065<br>(0.00165)     | 0.00211<br>(0.00158)     | -0.00291***<br>(0.00088) | -0.00296**<br>(0.00120) |                        |
| economic activity - pensioner | 0.00224<br>(0.00168)     | -0.00016<br>(0.00293)    | 0.00076<br>(0.00068)     | -0.00525***<br>(0.00183) | -0.00550***<br>(0.00225) | 0.00151**<br>(0.00061)   | 0.00083<br>(0.00185)     | 0.00024<br>(0.00066)     | -0.00035<br>(0.00059)    | -0.00055<br>(0.00041)    | -0.00026<br>(0.00049)         | -0.00055<br>(0.00208)    | -0.00212*<br>(0.00511)   | 0.00819***<br>(0.00121) | -0.01444***<br>(0.00178) | -0.00101<br>(0.00233)    | 0.00091<br>(0.00139)     | 0.00091<br>(0.00103)     | 0.00226**<br>(0.00118)   | -0.00215**<br>(0.00088)  | 0.00413***<br>(0.00109) |                        |
| region - south                | 0.00096<br>(0.00069)     | -0.00420***<br>(0.00058) | 0.00262***<br>(0.00078)  | -0.00304***<br>(0.00078) | -0.00482***<br>(0.00028) | 0.00148**<br>(0.00028)   | -0.00002<br>(0.00069)    | 0.00079***<br>(0.00027)  | -0.00028<br>(0.00015)    | -0.00044***<br>(0.00021) | -0.00028<br>(0.00005)         | -0.00148*<br>(0.00203)   | 0.01666***<br>(0.00020)  | 0.00151***<br>(0.00050) | -0.00210***<br>(0.00057) | -0.00112<br>(0.00113)    | 0.00048<br>(0.00063)     | -0.00157***<br>(0.00048) | 0.00044<br>(0.00041)     | -0.00007<br>(0.00035)    | -0.00056<br>(0.00035)   |                        |
| region - north                | -0.01382***<br>(0.00071) | -0.00301***<br>(0.00110) | -0.00188***<br>(0.00023) | 0.00879***<br>(0.00066)  | 0.00796***<br>(0.00079)  | 0.00159***<br>(0.00020)  | 0.00710***<br>(0.00070)  | 0.00039<br>(0.00026)     | -0.00037<br>(0.00023)    | 0.00086***<br>(0.00014)  | -0.00161***<br>(0.00019)      | 0.01455***<br>(0.00091)  | -0.01156***<br>(0.00049) | 0.00039<br>(0.00049)    | -0.00470***<br>(0.00059) | -0.00690***<br>(0.00091) | -0.00183***<br>(0.00051) | -0.00020<br>(0.00047)    | 0.00195***<br>(0.00045)  | 0.00208***<br>(0.00038)  | 0.00189***<br>(0.00038) |                        |
| number of children (age 0-2)  | -0.00617***<br>(0.00164) | -0.00272<br>(0.00266)    | -0.00005<br>(0.00058)    | 0.00725***<br>(0.00155)  | -0.00293*<br>(0.00175)   | -0.00046<br>(0.00048)    | 0.00241<br>(0.00163)     | -0.00111**<br>(0.00057)  | 0.00347***<br>(0.00060)  | 0.00015<br>(0.00030)     | -0.00009<br>(0.00050)         | -0.01036***<br>(0.00195) | 0.00458<br>(0.00459)     | 0.00343***<br>(0.00114) | 0.00214*<br>(0.00118)    | -0.00494**<br>(0.00233)  | -0.00375***<br>(0.00112) | -0.00632***<br>(0.00129) | -0.00369***<br>(0.00070) | -0.00265***<br>(0.00058) | 0.00150*<br>(0.00080)   |                        |
| number of children (age 3-6)  | -0.00480***<br>(0.00129) | 0.00519**<br>(0.00211)   | -0.00037<br>(0.00043)    | 0.00276**<br>(0.00128)   | -0.00340**<br>(0.00136)  | -0.00004<br>(0.00038)    | 0.00003<br>(0.00121)     | 0.00217***<br>(0.00049)  | -0.00042<br>(0.00032)    | 0.00017<br>(0.00023)     | -0.00389**<br>(0.00037)       | 0.01346***<br>(0.00335)  | 0.00041<br>(0.00083)     | 0.00258**<br>(0.00106)  | -0.00258<br>(0.00177)    | -0.00183*<br>(0.00094)   | -0.00134<br>(0.00100)    | -0.00422***<br>(0.00061) | -0.00203***<br>(0.00051) | -0.00031<br>(0.00058)    |                         |                        |
| number of elderly 65+         | 0.00345***<br>(0.00118)  | -0.00123<br>(0.00228)    | 0.00010<br>(0.00057)     | 0.00466***<br>(0.00148)  | 0.00084<br>(0.00164)     | 0.00009<br>(0.00045)     | 0.00062<br>(0.00152)     | 0.00123**<br>(0.00052)   | -0.00001<br>(0.00035)    | -0.00078***<br>(0.00031) | -0.00018<br>(0.00037)         | -0.00789**<br>(0.00156)  | -0.00789**<br>(0.00388)  | -0.00192*<br>(0.00102)  | 0.00037<br>(0.00132)     | 0.00338*<br>(0.00194)    | -0.00016<br>(0.00101)    | 0.00159**<br>(0.00087)   | -0.00150**<br>(0.00068)  | 0.00110<br>(0.00077)     | 0.00069<br>(0.00079)    |                        |
| y2                            | -0.01878***<br>(0.00198) | -0.05995***<br>(0.00385) | -0.00417***<br>(0.00090) | -0.00795***<br>(0.00189) | -0.02623***<br>(0.00271) | -0.00277***<br>(0.00244) | -0.02231***<br>(0.00244) | -0.00486***<br>(0.00060) | -0.00334***<br>(0.00045) | -0.00230***<br>(0.00062) | -0.00601***<br>(0.00026)      | -0.01041***<br>(0.00322) | 0.19964***<br>(0.00639)  | -0.00359*<br>(0.00213)  | 0.00622***<br>(0.00178)  | -0.00395<br>(0.00318)    | -0.00635***<br>(0.00194) | -0.00684***<br>(0.00175) | 0.00171<br>(0.00141)     | -0.00062<br>(0.00118)    | 0.00629***<br>(0.00125) |                        |
| y3                            | -0.01354***<br>(0.00256) | -0.03173***<br>(0.00113) | -0.00260**<br>(0.00240)  | -0.00476**<br>(0.00296)  | -0.01363***<br>(0.00090) | -0.00106<br>(0.00314)    | -0.00950***<br>(0.00115) | -0.00204*<br>(0.00086)   | -0.00071<br>(0.00060)    | 0.00039<br>(0.00095)     | -0.01480***<br>(0.00091)      | 0.10487**<br>(0.00388)   | 0.00395<br>(0.00276)     | 0.00375*<br>(0.00206)   | 0.00163<br>(0.00352)     | -0.01134***<br>(0.00223) | -0.00499***<br>(0.00180) | 0.00238**<br>(0.00142)   | 0.00125<br>(0.00114)     | 0.00441**<br>(0.00147)   |                         |                        |
| y4                            | -0.01484***<br>(0.00273) | -0.06847***<br>(0.00473) | -0.00599***<br>(0.00103) | -0.00133<br>(0.00288)    | -0.01531***<br>(0.00108) | 0.00109<br>(0.00302)     | -0.02813***<br>(0.00105) | -0.00889***<br>(0.00075) | -0.00248***<br>(0.00062) | -0.00304***<br>(0.00076) | -0.00594***<br>(0.00062)      | -0.01384***<br>(0.00380) | 0.14549***<br>(0.00824)  | -0.00429<br>(0.00288)   | 0.01293**<br>(0.00313)   | 0.03458***<br>(0.00442)  | -0.00479**<br>(0.00229)  | -0.00511**<br>(0.00219)  | 0.00014<br>(0.00110)     | 0.00629***<br>(0.00143)  | 0.00987***<br>(0.00160) |                        |
| y5                            | -0.01767***<br>(0.00279) | -0.02892***<br>(0.00525) | -0.00170<br>(0.00137)    | 0.00292<br>(0.00280)     | 0.00105<br>(0.00365)     | -0.00438***<br>(0.00092) | -0.00720**<br>(0.00355)  | -0.00653***<br>(0.00128) | -0.00165**<br>(0.00075)  | -0.00143**<br>(0.00065)  | -0.00396***<br>(0.00089)      | -0.01277***<br>(0.00333) | 0.10986**<br>(0.00918)   | -0.00378<br>(0.00235)   | 0.00119<br>(0.00211)     | 0.00585*<br>(0.00344)    | -0.01755***<br>(0.00216) | -0.00403*<br>(0.00211)   | 0.00073<br>(0.00098)     | 0.00052<br>(0.00114)     | 0.00827***<br>(0.00167) |                        |
| y6                            | -0.02375***<br>(0.00240) | -0.05640***<br>(0.00441) | -0.00683***<br>(0.00095) | -0.00462*<br>(0.00244)   | -0.01175***<br>(0.00370) | -0.00434***<br>(0.00088) | -0.03182***<br>(0.00264) | -0.0082***<br>(0.00104)  | -0.00052<br>(0.00085)    | -0.00238***<br>(0.00054) | -0.00636***<br>(0.00068)      | -0.01213***<br>(0.00343) | 0.17093**<br>(0.00754)   | 0.00127***<br>(0.00211) | 0.00680**<br>(0.00231)   | 0.02582**<br>(0.00413)   | -0.00808***<br>(0.00201) | -0.00448**<br>(0.00223)  | -0.00050<br>(0.00161)    | 0.00289**<br>(0.00126)   | 0.00818***<br>(0.00169) |                        |
| y7                            | -0.01616***<br>(0.00276) | -0.06382***<br>(0.00480) | -0.00378***<br>(0.00109) | -0.00835***<br>(0.00311) | -0.03219***<br>(0.00311) | -0.00012<br>(0.00108)    | -0.02608***<br>(0.00295) | -0.00642***<br>(0.00103) | -0.00235***<br>(0.00068) | -0.00096<br>(0.00059)    | -0.00537***<br>(0.00076)      | -0.00566<br>(0.00370)    | 0.18022***<br>(0.00679)  | 0.01386***<br>(0.00186) | 0.01330***<br>(0.00261)  | 0.02560***<br>(0.00405)  | -0.00580**<br>(0.00226)  | -0.00904***<br>(0.00205) | 0.00038<br>(0.00148)     | 0.00178<br>(0.00147)     | 0.01180***<br>(0.00168) |                        |
| y8                            | -0.01651***<br>(0.00351) | -0.07850***<br>(0.00416) | -0.00598***<br>(0.00097) | -0.01036**<br>(0.00285)  | -0.02907***<br>(0.00335) | -0.00388***<br>(0.00089) | -0.03641***<br>(0.00284) | -0.00972***<br>(0.00095) | -0.00316***<br>(0.00067) | -0.00157***<br>(0.00057) | -0.00676***<br>(0.00079)      | 0.00263<br>(0.00395)     | 0.19487***<br>(0.00690)  | 0.01442***<br>(0.00192) | 0.01180***<br>(0.00242)  | -0.00405*<br>(0.00364)   | -0.00549**<br>(0.00222)  | 0.00020<br>(0            |                          |                          |                         |                        |

Table S4b. Estimation results: Middle-income group

| VARIABLES                     | Cereals     | Meat        | Fish        | Milk        | Other dairy products | Oils and fats | Fruits and vegetables | Desserts   | Ready-made food | Coffee and tea | Other non-alcoholic beverages | Clothes     | Housing     | Furniture   | Health      | Transportation | Communication | Recreation  | Education   | Bars and restaurants | Alcohol    |          |
|-------------------------------|-------------|-------------|-------------|-------------|----------------------|---------------|-----------------------|------------|-----------------|----------------|-------------------------------|-------------|-------------|-------------|-------------|----------------|---------------|-------------|-------------|----------------------|------------|----------|
| exptob                        | -0.0001***  | 0.0019***   | 0.0001      | 0.0004***   | -0.0001***           | 0.0001        | -0.0006**             | -0.0000    | 0.0000          | 0.0001***      | 0.0002**                      | -0.0008*    | -0.0003***  | -0.0007**   | -0.0004     | 0.0007         | 0.0001        | -0.0006***  | -0.0019***  | 0.0001               | 0.0000***  |          |
| lnM                           | (0.0002)    | (0.0006)    | (0.0001)    | (0.0001)    | (0.0003)             | (0.0001)      | (0.0002)              | (0.0001)   | (0.0000)        | (0.0001)       | (0.0001)                      | (0.0003)    | (0.0003)    | (0.0005)    | (0.0003)    | (0.0005)       | (0.0003)      | (0.0003)    | (0.0002)    | (0.0003)             | (0.0002)   | (0.0002) |
| lnM2                          | -0.0032     | -0.0302     | -0.0076     | -0.0406     | -0.0766***           | 0.0672        | 0.0716***             | 0.0208**   | -0.0000         | -0.0152***     | -0.0016                       | -0.0647**   | -0.1989***  | -0.0406     | -0.0207     | 0.1970         | 0.1307        | 0.0949***   | 0.0596***   | -0.0609              | 0.0139     |          |
| lnM2                          | (0.0175)    | (0.0450)    | (0.0092)    | (0.0179)    | (0.0281)             | (0.0079)      | (0.0273)              | (0.0382)   | (0.0599)        | (0.0546)       | (0.0626)                      | (0.0370)    | (0.0836)    | (0.0317)    | (0.0342)    | (0.0396)       | (0.0162)      | (0.0180)    | (0.0284)    | (0.0588)             | (0.0145)   |          |
| lnM2                          | -0.0016     | 0.0052      | 0.0075      | 0.0051      | 0.0045*              | -0.0080       | -0.0063***            | -0.00182** | -0.0002         | 0.00079*       | -0.0002                       | 0.00893**   | -0.0181***  | 0.0046*     | 0.00150     | -0.00967***    | -0.00773**    | 0.00491***  | 0.0087***   | 0.0062               | -0.0069    |          |
| lnM2                          | (0.0014)    | (0.0036)    | (0.0076)    | (0.0014)    | (0.0023)             | (0.0056)      | (0.0025)              | (0.0007)   | (0.00048)       | (0.0002)       | (0.00052)                     | (0.0026)    | (0.0016)    | (0.0022)    | (0.0022)    | (0.0032)       | (0.0013)      | (0.0025)    | (0.0024)    | (0.0047)             | (0.0016)   |          |
| tob                           | -0.0547***  | -0.0210**   | 0.0016      | 0.0346***   | 0.0334**             | 0.0494        | -0.0057*              | 0.0823**   | -0.0363         | 0.00190*       | 0.0276**                      | -0.2682**   | -0.1469*    | -0.03621**  | 0.0659      | 0.0649         | 0.0284        | -0.0527***  | -0.07416**  | -0.1083              | 0.2364**   |          |
| tob                           | (0.01675)   | (0.01017)   | (0.03973)   | (0.01401)   | (0.03803)            | (0.0315)      | (0.04466)             | (0.02727)  | (0.03463)       | (0.00509)      | (0.02166)                     | (0.13938)   | (0.07998)   | (0.07427)   | (0.01490)   | (0.01668)      | (0.02855)     | (0.16687)   | (0.10978)   | (0.01675)            | (0.01675)  |          |
| tob*lnM                       | -0.01639    | 0.01649     | 0.00152     | 0.01160     | -0.00446             | -0.01483      | -0.00368              | -0.02651*  | 0.01038         | -0.0027        | 0.00789                       | 0.08846*    | 0.01181     | 0.01259     | -0.02392    | -0.01856       | -0.02820      | 0.007124    | 0.02173     | 0.04063              | -0.06510*  |          |
| tob*lnM                       | (0.0244)    | (0.06515)   | (0.01285)   | (0.02366)   | (0.04410)            | (0.01191)     | (0.03331)             | (0.01414)  | (0.00872)       | (0.00797)      | (0.00945)                     | (0.04555)   | (0.01259)   | (0.04168)   | (0.05011)   | (0.02445)      | (0.03282)     | (0.02445)   | (0.03453)   | (0.05556)            | (0.03418)  |          |
| tob*lnM2                      | 0.00119     | -0.00189    | -0.00028    | -0.00100    | -0.00039             | 0.00113       | 0.00039               | 0.00232*   | -0.00039        | 0.00039        | -0.00054                      | 0.00147     | -0.00097    | 0.00228     | 0.00228     | 0.00228        | 0.00228       | 0.00228     | 0.00228     | 0.00228              | 0.00228    |          |
| tob*lnM2                      | (0.00208)   | (0.00520)   | (0.00104)   | (0.00185)   | (0.00346)            | (0.00093)     | (0.00262)             | (0.00111)  | (0.00070)       | (0.00062)      | (0.00075)                     | (0.00370)   | (0.00987)   | (0.00341)   | (0.00396)   | (0.00425)      | (0.00190)     | (0.00199)   | (0.00288)   | (0.00458)            | (0.00255)  |          |
| household size                | 0.00655**   | 0.00379***  | -0.0002     | 0.00432***  | 0.00554***           | 0.00092***    | 0.00266***            | 0.00052*   | 0.00059**       | 0.0007***      | 0.00023                       | -0.00214*   | -0.02443*** | -0.00243*** | 0.0023***   | 0.00184        | 0.00017       | 0.00040     | 0.00392***  | -0.00203**           | 0.00073*   |          |
| household size                | (0.00051)   | (0.00141)   | (0.00027)   | (0.00037)   | (0.00070)            | (0.00017)     | (0.00070)             | (0.00029)  | (0.00024)       | (0.00012)      | (0.00023)                     | (0.00122)   | (0.00202)   | (0.00078)   | (0.00058)   | (0.00139)      | (0.00058)     | (0.00072)   | (0.00106)   | (0.00086)            | (0.00043)  |          |
| mean age                      | -0.00012*** | 0.00027**   | 0.00006**   | 0.00012***  | 0.00037***           | 0.00005**     | 0.00021**             | -0.00009** | -0.00002        | 0.00003**      | -0.00003**                    | -0.00082**  | -0.00008    | 0.00006     | 0.00078***  | -0.00013       | 0.00000       | -0.00049*** | -0.00004    | 0.00003              | 0.00017*** |          |
| mean age                      | (0.00004)   | (0.00012)   | (0.00002)   | (0.00004)   | (0.00007)            | (0.00002)     | (0.00006)             | (0.00002)  | (0.00002)       | (0.00001)      | (0.00002)                     | (0.00002)   | (0.00002)   | (0.00006)   | (0.00008)   | (0.00010)      | (0.00005)     | (0.00006)   | (0.00006)   | (0.00005)            | (0.00004)  |          |
| max education                 | -0.00074*** | -0.00453*** | 0.00004     | -0.00094**  | -0.00244***          | -0.00032**    | -0.00088***           | -0.00030** | -0.00047**      | -0.00019**     | 0.00001                       | 0.00152**   | 0.00568***  | -0.00042    | -0.00111**  | 0.00079*       | 0.00232***    | 0.00135***  | 0.00022     | 0.00059***           | -0.00077** |          |
| max education                 | (0.00017)   | (0.00053)   | (0.00011)   | (0.00018)   | (0.00011)            | (0.00007)     | (0.00028)             | (0.00012)  | (0.00071)       | (0.00005)      | (0.00008)                     | (0.00039)   | (0.00100)   | (0.00032)   | (0.00035)   | (0.00045)      | (0.00020)     | (0.00024)   | (0.00029)   | (0.00018)            | (0.00018)  |          |
| economic activity - employed  | 0.00033     | 0.00888*    | 0.00158*    | -0.00152    | 0.00278              | 0.00102       | 0.00327               | 0.00061    | 0.00111         | -0.00081*      | 0.00022                       | -0.01888**  | 0.02516**   | -0.00258    | 0.00573*    | -0.01653***    | -0.00962**    | 0.00230     | 0.00494     | -0.00536**           | -0.00025   |          |
| economic activity - employed  | (0.00210)   | (0.00471)   | (0.00089)   | (0.00187)   | (0.00326)            | (0.00065)     | (0.00257)             | (0.00103)  | (0.00084)       | (0.00049)      | (0.00070)                     | (0.03336)   | (0.01056)   | (0.00218)   | (0.00321)   | (0.00384)      | (0.00175)     | (0.00383)   | (0.00307)   | (0.00185)            | (0.00177)  |          |
| economic activity - pensioner | 0.00026     | 0.00556**   | -0.00005    | -0.00063    | -0.00370**           | 0.00006       | 0.00135               | 0.00151*** | -0.00002        | -0.00053*      | 0.00065                       | -0.01416*** | 0.03100***  | 0.00028     | 0.00775***  | -0.02082***    | -0.00530***   | 0.00236*    | 0.00586***  | -0.00805***          | -0.00062   |          |
| economic activity - pensioner | (0.00091)   | (0.00257)   | (0.00047)   | (0.00103)   | (0.00155)            | (0.00039)     | (0.00148)             | (0.00053)  | (0.00030)       | (0.00028)      | (0.00048)                     | (0.01611)   | (0.00493)   | (0.00051)   | (0.00177)   | (0.00237)      | (0.00110)     | (0.00121)   | (0.00139)   | (0.00111)            | (0.00029)  |          |
| region - south                | -0.00135*** | -0.01102*** | 0.00079***  | -0.00178*** | -0.00612***          | 0.00075***    | -0.00317***           | -0.00032*  | -0.00050**      | -0.00042**     | -0.00061**                    | 0.00296***  | 0.02470***  | -0.00003*   | 0.00271***  | -0.00322***    | 0.00128***    | 0.00064     | 0.00064     | -0.00060             | -0.00155** |          |
| region - south                | (0.00025)   | (0.00069)   | (0.00020)   | (0.00038)   | (0.00012)            | (0.00035)     | (0.00017)             | (0.00011)  | (0.00007)       | (0.00012)      | (0.00022)                     | (0.00143)   | (0.00047)   | (0.00059)   | (0.00037)   | (0.00059)      | (0.00051)     | (0.00051)   | (0.00034)   | (0.00020)            | (0.00020)  |          |
| region - north                | -0.00404*** | -0.00026    | -0.00216*** | 0.00050**   | 0.00446***           | 0.000169**    | 0.00033***            | -0.00004   | 0.00003         | 0.00075**      | -0.00149**                    | 0.01292**   | -0.01765*** | 0.00018**   | -0.00402**  | -0.00347***    | -0.00295***   | -0.00194**  | 0.00311***  | 0.00138**            | 0.0017***  |          |
| region - north                | (0.00037)   | (0.00100)   | (0.00016)   | (0.00040)   | (0.00063)            | (0.00016)     | (0.00066)             | (0.00022)  | (0.00012)       | (0.00011)      | (0.00013)                     | (0.00083)   | (0.00069)   | (0.00087)   | (0.00062)   | (0.00040)      | (0.00048)     | (0.00071)   | (0.00038)   | (0.00048)            | (0.00040)  |          |
| number of children (age 0-2)  | -0.00192*   | 0.00776**   | -0.00038    | 0.00504***  | 0.00071              | -0.00026      | 0.00155               | 0.00025    | 0.00270**       | -0.00031       | 0.00128**                     | -0.00850**  | 0.00324     | 0.00402**   | 0.00154     | -0.00720**     | -0.00451***   | -0.01190**  | -0.01304*** | -0.00634**           | 0.00064    |          |
| number of children (age 0-2)  | (0.00098)   | (0.00352)   | (0.00055)   | (0.00085)   | (0.00150)            | (0.00031)     | (0.00150)             | (0.00057)  | (0.00122)       | (0.00024)      | (0.00054)                     | (0.00278)   | (0.00501)   | (0.00202)   | (0.00154)   | (0.00302)      | (0.00122)     | (0.00123)   | (0.00150)   | (0.00105)            | (0.00110)  |          |
| number of children (age 3-6)  | 0.00095     | 0.01034***  | 0.00066     | 0.00247***  | 0.00307**            | 0.00020       | 0.00158               | 0.00304*** | 0.00011         | 0.00041**      | 0.00059                       | -0.00479**  | 0.00088     | 0.00142     | 0.00327***  | -0.00696***    | -0.00546***   | -0.00490*** | -0.01259*** | -0.00602**           | 0.00260*** |          |
| number of children (age 3-6)  | (0.00094)   | (0.00274)   | (0.00048)   | (0.00057)   | (0.00119)            | (0.00026)     | (0.00103)             | (0.00053)  | (0.00038)       | (0.00020)      | (0.00037)                     | (0.00203)   | (0.00088)   | (0.00117)   | (0.00208)   | (0.00091)      | (0.00117)     | (0.00108)   | (0.00094)   | (0.00074)            | (0.00074)  |          |
| number of elderly 65+         | 0.00083     | 0.00174     | -0.00036    | 0.00034     | 0.00162              | -0.00015      | 0.00025               | 0.00123*** | 0.00022         | 0.00023        | -0.00042                      | 0.00153     | -0.00210    | 0.00066     | 0.00373**   | -0.00113       | 0.00117       | -0.00538*** | -0.00249**  | 0.00099              |            |          |
| number of elderly 65+         | (0.00064)   | (0.00193)   | (0.00036)   | (0.00065)   | (0.00109)            | (0.00030)     | (0.00114)             | (0.00038)  | (0.00023)       | (0.00022)      | (0.00028)                     | (0.00133)   | (0.00051)   | (0.00106)   | (0.00135)   | (0.00078)      | (0.00070)     | (0.00096)   | (0.00070)   | (0.00077)            |            |          |
| y2                            | -0.00708*** | -0.03286*** | -0.00276**  | -0.00001    | -0.01034***          | -0.00306***   | -0.02578***           | -0.00237*  | -0.00085        | -0.00208**     | -0.00711***                   | -0.01942*** | -0.01945*** | -0.01102*** | -0.01022*** | -0.01012**     | 0.00469**     | -0.00904    | -0.00720*** |                      |            |          |
| y2                            | (0.00183)   | (0.00714)   | (0.00120)   | (0.00134)   | (0.00305)            | (0.00100)     | (0.00548)             | (0.00132)  | (0.00060)       | (0.00060)      | (0.00115)                     | (0.00697)   | (0.00960)   | (0.00346)   | (0.00562)   | (0.00346)      | (0.00568)     | (0.00502)   | (0.00217)   | (0.00617)            | (0.00251)  |          |
| y3                            | -0.00607*** | -0.03768*** | -0.00170    | -0.01204*** | -0.00355***          | -0.02745***   | -0.00402***           | -0.00011   | -0.00180**      | -0.00051***    | -0.00366**                    | 0.18911***  | -0.02325*** | 0.00211     | 0.00380     | -0.01157***    | -0.00813      | 0.00692***  | -0.00541    | -0.00660**           |            |          |
| y3                            | (0.00196)   | (0.00751)   | (0.00151)   | (0.00138)   | (0.00308)            | (0.00102)     | (0.00522)             | (0.00134)  | (0.00074)       | (0.00055)      | (0.00119)                     | (0.00680)   | (0.01070)   | (0.00351)   | (0.00677)   | (0.00384)      | (0.00599)     | (0.00212)   | (0.00623)   | (0.00274)            |            |          |
| y4                            | -0.00199    | -0.04590*** | -0.00402**  | 0.00155     | -0.00358**           | -0.00213      | -0.02885**            | -0.00688** | -0.00089        | -0.00299**     | -0.00616**                    | -0.03301**  | 0.18418***  | -0.02580**  | 0.00504     | 0.01728**      | -0.01088**    | 0.00425**   | -0.00309    | -0.00946**           |            |          |
| y4                            | (0.00200)   | (0.00718)   | (0.00121)   | (0.00141)   | (0.00303)            | (0.00099)     | (0.00551)             | (0.00129)  | (0.00058)       | (0.00059)      | (0.00119)                     | (0.00677)   | (0.01023)   | (0.00771)   | (0.00343)   | (0.00581)      | (0.00198)     | (0.00506)   | (0.00198)   | (0.00263)            |            |          |
| y5                            | -0.00690*** | -0.03323**  | -0.00542**  | 0.00028     | -0.00736**           | -0.00434***   | -0.02802***           | -0.00427** | -0.00016        | -0.00227**     | -0.00545**                    | -0.02822**  | 0.19431***  | -0.02465**  | 0.00576     | -0.00162       | -0.01670**    | -0.00951*   | 0.00646**   | -0.00621             | -0.01035** |          |
| y5                            | (0.00199)   | (0.00744)   | (0.00127)   | (0.00153)   | (0.00101)            | (0.00569)     | (0.00140)             | (0.00066)  | (0.00069)       | (0.00118)      | (0.00677)                     | (0.01087)   | (0.00770)   | (0.00374)   | (0.00374)   | (0.00384)      | (0.00503)     | (0.00247)   | (0.00598)   | (0.00267)            |            |          |
| y6                            | -0.00739*** | -0.02674**  | -0.00574**  | 0.00051     | -0.00758**           | -0.00477**    | -0.03050***           | -0.00564** | -0.00020        | -0.00223**     | -0.00693**                    | -0.02924**  | 0.19813***  | -0.03121**  | 0.00454     | 0.00191        | -0.01563***   | -0.01081**  | 0.00910**   | -0.00720             | -0.00940** |          |
| y6                            | (0.00186)   | (0.00747)   | (0.00115)   | (0.00147)   | (0.00300)            | (0.00547)     | (0.001                |            |                 |                |                               |             |             |             |             |                |               |             |             |                      |            |          |

Table S4c. Estimation results: High-income group

| VARIABLES                     | Cereals                  | Meat                     | Fish                     | Milk                     | Other dairy products     | Oils and fats            | Fruits and vegetables    | Deserts                  | Ready-made food          | Coffee and tea           | Other non-alcoholic beverages | Clothes                  | Housing                  | Furniture                | Health                   | Transportation           | Communication            | Recreation               | Education                | Bars and restaurants     | Alcohol                  |                          |                         |
|-------------------------------|--------------------------|--------------------------|--------------------------|--------------------------|--------------------------|--------------------------|--------------------------|--------------------------|--------------------------|--------------------------|-------------------------------|--------------------------|--------------------------|--------------------------|--------------------------|--------------------------|--------------------------|--------------------------|--------------------------|--------------------------|--------------------------|--------------------------|-------------------------|
| exptob                        | -0.0004***<br>(0.0002)   | 0.0015***<br>(0.0005)    | 0.0001<br>(0.0001)       | 0.0001<br>(0.0001)       | -0.0006***<br>(0.0002)   | -0.0001*<br>(0.0000)     | -0.0003<br>(0.0002)      | -0.0002**<br>(0.0001)    | -0.0001**<br>(0.0000)    | 0.0000<br>(0.0000)       | 0.0000<br>(0.0001)            | -0.0002<br>(0.0005)      | -0.0026***<br>(0.0008)   | -0.0003<br>(0.0004)      | 0.0001<br>(0.0004)       | 0.0000<br>(0.0007)       | 0.0002<br>(0.0002)       | 0.0000<br>(0.0004)       | 0.0000<br>(0.0005)       | 0.0000<br>(0.0005)       | 0.0000<br>(0.0005)       | 0.0000<br>(0.0002)       |                         |
| lnM                           | 0.0048<br>(0.0139)       | 0.23605***<br>(0.0459)   | 0.02927***<br>(0.0088)   | -0.1990<br>(0.0170)      | -0.0269<br>(0.0286)      | 0.0063<br>(0.0056)       | 0.0988***<br>(0.0192)    | 0.0075<br>(0.0079)       | 0.0099<br>(0.0046)       | -0.0059<br>(0.0063)      | 0.0048<br>(0.0518)            | 0.0465<br>(0.3914)       | -0.0340<br>(0.0861)      | 0.1369***<br>(0.0371)    | -0.1474<br>(0.0892)      | -0.1983***<br>(0.0978)   | 0.07768***<br>(0.0167)   | -0.0421<br>(0.0326)      | -0.1721***<br>(0.0518)   | -0.107<br>(0.0349)       | 0.05360***<br>(0.0112)   | 0.05609***<br>(0.0112)   |                         |
| lnM2                          | -0.00163<br>(0.00104)    | -0.01816***<br>(0.00340) | -0.00214***<br>(0.00067) | 0.00095<br>(0.00122)     | 0.00053<br>(0.00206)     | -0.00072*<br>(0.00041)   | -0.00804***<br>(0.00142) | -0.00081<br>(0.00058)    | -0.00023<br>(0.00032)    | 0.00019<br>(0.00027)     | -0.00073*<br>(0.00039)        | -0.00188<br>(0.00043)    | -0.00685<br>(0.00632)    | -0.01272**<br>(0.00293)  | 0.00172**<br>(0.00096)   | 0.01876***<br>(0.00071)  | -0.00645***<br>(0.00254) | 0.00411<br>(0.00422)     | 0.01429***<br>(0.00441)  | 0.00256<br>(0.00265)     | -0.00379***<br>(0.00082) | -0.00379***<br>(0.00082) |                         |
| lob                           | 0.06268***<br>(0.01371)  | 0.34756***<br>(0.04183)  | 0.05237<br>(0.00983)     | -0.10426<br>(0.02455)    | -0.12515**<br>(0.0542)   | -0.23445**<br>(0.01598)  | 0.209150<br>(0.02988)    | 0.00255**<br>(0.00119)   | 0.01229<br>(0.01891)     | 0.00180<br>(0.01883)     | 0.01250<br>(0.02022)          | 0.81899*<br>(0.17376)    | 0.17036<br>(0.30088)     | 0.56866<br>(0.1773)      | 0.21548<br>(0.50088)     | 0.03708<br>(0.08161)     | 0.02402<br>(0.02804)     | -0.28453***<br>(0.05388) | 0.11603***<br>(0.02804)  | 0.21649***<br>(0.07013)  | 0.21649***<br>(0.07013)  | 0.21649***<br>(0.07013)  | 0.21649***<br>(0.07013) |
| lob*lnM                       | 0.01810<br>(0.02036)     | -0.08921<br>(0.06572)    | -0.01416<br>(0.02039)    | 0.03101<br>(0.03811)     | -0.03455<br>(0.00788)    | 0.00943<br>(0.01143)     | -0.02653<br>(0.01143)    | 0.00132<br>(0.00275)     | -0.00025<br>(0.00553)    | 0.00385<br>(0.00836)     | 0.00091<br>(0.00817)          | 0.00082<br>(0.05716)     | 0.19556<br>(0.02822)     | -0.05060<br>(0.09833)    | 0.15109<br>(0.15479)     | -0.05105<br>(0.00947)    | 0.00947<br>(0.00682)     | 0.00682<br>(0.03386)     | 0.08949<br>(0.04290)     | 0.04756<br>(0.04290)     | -0.05447***<br>(0.00274) | -0.05447***<br>(0.00274) |                         |
| lob*lnM2                      | -0.00130<br>(0.00151)    | 0.00567<br>(0.00494)     | 0.00093<br>(0.00148)     | -0.00228<br>(0.00276)    | 0.00235<br>(0.00058)     | -0.00063<br>(0.00231)    | 0.00191<br>(0.00084)     | 0.00001<br>(0.00084)     | 0.00000<br>(0.00051)     | -0.00028<br>(0.00040)    | -0.00008<br>(0.00062)         | -0.00048<br>(0.00431)    | -0.01121<br>(0.00908)    | 0.00378<br>(0.00399)     | -0.01133<br>(0.01191)    | 0.00304<br>(0.01191)     | -0.00063<br>(0.00485)    | -0.00045<br>(0.00651)    | -0.00699<br>(0.00327)    | -0.00449<br>(0.00327)    | 0.00346**<br>(0.00153)   | 0.00346**<br>(0.00153)   |                         |
| household size                | 0.00576***<br>(0.00040)  | 0.01775***<br>(0.00144)  | 0.00108***<br>(0.00028)  | 0.00284***<br>(0.00028)  | 0.00625***<br>(0.0005)   | 0.00124***<br>(0.00014)  | 0.00626***<br>(0.00058)  | 0.00101***<br>(0.00023)  | 0.0052***<br>(0.00014)   | 0.00062***<br>(0.00010)  | 0.00026<br>(0.00018)          | -0.00315***<br>(0.00148) | -0.00967***<br>(0.00232) | 0.00655***<br>(0.00118)  | -0.00350<br>(0.00263)    | -0.00701***<br>(0.00264) | 0.00160***<br>(0.00054)  | -0.00344***<br>(0.00106) | 0.01151***<br>(0.00106)  | -0.00884***<br>(0.00054) | 0.00049<br>(0.00041)     | 0.00049<br>(0.00041)     |                         |
| mean age                      | -0.00101***<br>(0.00003) | 0.00049***<br>(0.00003)  | 0.00008***<br>(0.00003)  | 0.00003<br>(0.00003)     | 0.00017***<br>(0.00005)  | 0.00006***<br>(0.00001)  | 0.00025***<br>(0.00002)  | -0.00005***<br>(0.00001) | -0.00001***<br>(0.00001) | -0.00000***<br>(0.00002) | -0.00001***<br>(0.00001)      | -0.00113***<br>(0.00002) | 0.00033***<br>(0.00003)  | 0.0004***<br>(0.00013)   | 0.00002***<br>(0.00002)  | -0.00029***<br>(0.00004) | -0.00009***<br>(0.00004) | -0.00040***<br>(0.00004) | -0.00039***<br>(0.00010) | -0.00041***<br>(0.00008) | 0.00016***<br>(0.00004)  | 0.00016***<br>(0.00004)  |                         |
| max education                 | -0.00126***<br>(0.00016) | -0.00536***<br>(0.00062) | 0.00010<br>(0.0014)      | -0.00109***<br>(0.00015) | -0.00170***<br>(0.00032) | -0.00191***<br>(0.00077) | -0.00067***<br>(0.00027) | -0.00012<br>(0.00010)    | -0.00020***<br>(0.00005) | -0.00011**<br>(0.00004)  | -0.00031***<br>(0.00008)      | 0.00203***<br>(0.00039)  | 0.00687***<br>(0.00116)  | -0.00152***<br>(0.00046) | -0.00189***<br>(0.00058) | 0.00116***<br>(0.00020)  | 0.00172***<br>(0.00020)  | 0.00257***<br>(0.00031)  | -0.00090***<br>(0.00040) | 0.00115***<br>(0.00029)  | 0.0015***<br>(0.00029)   | 0.0015***<br>(0.00029)   |                         |
| economic activity - employed  | -0.00363<br>(0.00239)    | 0.00516<br>(0.00883)     | -0.00091<br>(0.00114)    | -0.00159<br>(0.00113)    | -0.00032<br>(0.00465)    | 0.00009<br>(0.00101)     | -0.00106<br>(0.00417)    | 0.00013<br>(0.00124)     | 0.00054<br>(0.00109)     | -0.00040<br>(0.00071)    | 0.00006<br>(0.00096)          | -0.01546***<br>(0.00595) | 0.01213<br>(0.02000)     | 0.00847<br>(0.00889)     | 0.01313*<br>(0.00795)    | 0.00847<br>(0.00818)     | -0.00553**<br>(0.00304)  | -0.00334<br>(0.00351)    | 0.00831<br>(0.00576)     | -0.01421***<br>(0.00337) | 0.00451<br>(0.00364)     | 0.00451<br>(0.00364)     |                         |
| economic activity - pensioner | 0.00122<br>(0.00090)     | -0.00294<br>(0.00317)    | 0.00039<br>(0.00076)     | 0.00169**<br>(0.00067)   | -0.00059<br>(0.00169)    | 0.00019<br>(0.00035)     | 0.00238*<br>(0.00141)    | 0.00126**<br>(0.00054)   | -0.00024<br>(0.00031)    | 0.00072**<br>(0.00028)   | -0.00049<br>(0.00040)         | -0.01172***<br>(0.00227) | 0.04264***<br>(0.00583)  | -0.00230<br>(0.00245)    | 0.00949***<br>(0.00275)  | -0.02736***<br>(0.00341) | -0.00398***<br>(0.00122) | 0.00213<br>(0.00153)     | 0.01079***<br>(0.00215)  | -0.01780***<br>(0.00174) | -0.00384***<br>(0.00096) | -0.00384***<br>(0.00096) |                         |
| region - south                | -0.00127***<br>(0.00020) | -0.01150***<br>(0.00087) | -0.00073***<br>(0.00017) | -0.00167***<br>(0.00018) | -0.00498***<br>(0.00023) | -0.00078***<br>(0.00010) | -0.00236***<br>(0.00007) | -0.00041***<br>(0.00005) | -0.00044***<br>(0.00009) | -0.00044***<br>(0.00009) | -0.00055***<br>(0.00009)      | 0.00046***<br>(0.00028)  | 0.00035***<br>(0.00028)  | 0.00045***<br>(0.00028)  | 0.00033***<br>(0.00028)  | 0.00047***<br>(0.00028)  | 0.00032***<br>(0.00028)  | 0.00032***<br>(0.00028)  | 0.00032***<br>(0.00028)  | 0.00032***<br>(0.00028)  | 0.00032***<br>(0.00028)  | 0.00032***<br>(0.00028)  |                         |
| region - north                | -0.00216***<br>(0.00046) | -0.00535***<br>(0.00196) | -0.00255***<br>(0.00046) | -0.00218***<br>(0.00087) | -0.00293***<br>(0.00018) | -0.00600***<br>(0.00084) | -0.00024**<br>(0.00030)  | -0.00128***<br>(0.00017) | -0.00024**<br>(0.00013)  | -0.00128***<br>(0.00019) | -0.00089***<br>(0.00121)      | -0.00181***<br>(0.00312) | -0.00000<br>(0.00102)    | -0.00383***<br>(0.00126) | -0.00155<br>(0.00148)    | -0.00245***<br>(0.00066) | -0.00356***<br>(0.00070) | -0.00296***<br>(0.00116) | -0.00296***<br>(0.00088) | 0.00125<br>(0.00054)     | 0.00125<br>(0.00054)     | 0.00125<br>(0.00054)     |                         |
| number of children (age 0-2)  | -0.00146<br>(0.00163)    | 0.00007<br>(0.00548)     | -0.0015***<br>(0.00093)  | 0.00133<br>(0.00093)     | -0.00397***<br>(0.00148) | -0.00050<br>(0.00045)    | -0.00203<br>(0.00193)    | 0.00030<br>(0.00078)     | 0.00650***<br>(0.00131)  | -0.00010<br>(0.00039)    | 0.00125<br>(0.00093)          | -0.00855<br>(0.00529)    | 0.02243***<br>(0.00830)  | 0.02098***<br>(0.00533)  | 0.00948<br>(0.00807)     | -0.01951***<br>(0.00715) | -0.00288<br>(0.00188)    | -0.00997<br>(0.00425)    | -0.03361***<br>(0.00389) | -0.00699**<br>(0.00289)  | -0.00699**<br>(0.00289)  | -0.00699**<br>(0.00289)  |                         |
| number of children (age 3-6)  | 0.00169<br>(0.00130)     | 0.00619<br>(0.00459)     | 0.00120<br>(0.00155)     | 0.00054<br>(0.00063)     | 0.00004<br>(0.00151)     | 0.00009<br>(0.00042)     | 0.00264<br>(0.00184)     | 0.00304***<br>(0.00080)  | -0.00005<br>(0.00046)    | 0.00041<br>(0.00044)     | 0.00171*<br>(0.00093)         | -0.00557<br>(0.00426)    | 0.00390<br>(0.00621)     | 0.01501***<br>(0.00493)  | 0.01376***<br>(0.00492)  | -0.00863<br>(0.00623)    | -0.00592***<br>(0.00153) | 0.00135<br>(0.00153)     | -0.02801***<br>(0.00215) | -0.00996***<br>(0.00174) | -0.00996***<br>(0.00174) | -0.00996***<br>(0.00174) |                         |
| number of elderly (65+)       | 0.00078<br>(0.00060)     | -0.00134<br>(0.00211)    | 0.00002<br>(0.00046)     | 0.00110<br>(0.00079)     | 0.00018<br>(0.00106)     | 0.00005<br>(0.00025)     | 0.00077**<br>(0.00098)   | 0.00011<br>(0.00020)     | 0.00015<br>(0.00020)     | 0.00036<br>(0.00029)     | 0.00413**<br>(0.00426)        | -0.00355<br>(0.00621)    | -0.00418**<br>(0.00493)  | 0.00406*<br>(0.00492)    | -0.00066<br>(0.00623)    | 0.00058<br>(0.00153)     | -0.00066<br>(0.00306)    | -0.00533***<br>(0.00363) | 0.00017<br>(0.00242)     | -0.00052<br>(0.00242)    | -0.00052<br>(0.00242)    | -0.00052<br>(0.00242)    |                         |
| y2                            | -0.00807**<br>(0.00440)  | -0.02483***<br>(0.01099) | -0.00165<br>(0.00261)    | 0.00303*<br>(0.00169)    | -0.00937***<br>(0.00384) | 0.00003<br>(0.0033)      | -0.01439***<br>(0.00630) | -0.00245***<br>(0.00189) | -0.00142<br>(0.00121)    | -0.00622***<br>(0.00088) | -0.003298**<br>(0.00211)      | 0.20122***<br>(0.01678)  | -0.02886*<br>(0.01678)   | -0.00413<br>(0.01571)    | 0.01574<br>(0.01540)     | 0.00439<br>(0.01785)     | 0.00082<br>(0.00709)     | 0.00082<br>(0.01667)     | 0.00116<br>(0.00486)     | 0.00150<br>(0.02035)     | 0.01187**<br>(0.00303)   | -0.02598<br>(0.00677)    | -0.02598<br>(0.00677)   |
| y3                            | -0.00911**<br>(0.00422)  | -0.01996*<br>(0.01159)   | -0.00397*<br>(0.00227)   | -0.01141***<br>(0.00150) | -0.00096<br>(0.00376)    | -0.00036<br>(0.00128)    | -0.01544***<br>(0.00614) | -0.00563***<br>(0.00183) | -0.00272**<br>(0.00116)  | -0.00043<br>(0.00089)    | -0.00565***<br>(0.00207)      | -0.04748***<br>(0.01588) | 0.21248***<br>(0.02644)  | -0.03371**<br>(0.01586)  | 0.00346<br>(0.01508)     | 0.01398<br>(0.01674)     | 0.00388<br>(0.00666)     | 0.00388<br>(0.01661)     | 0.01398<br>(0.00476)     | -0.02721<br>(0.00975)    | -0.02721<br>(0.00975)    | -0.02721<br>(0.00975)    |                         |
| y4                            | -0.00873<br>(0.00429)    | -0.03535***<br>(0.01066) | -0.00297<br>(0.00235)    | 0.00040<br>(0.00145)     | -0.00672*<br>(0.00367)   | 0.00113<br>(0.01126)     | -0.01511**<br>(0.00718)  | -0.00606***<br>(0.00115) | -0.00288**<br>(0.00086)  | -0.00132<br>(0.00206)    | -0.00619***<br>(0.01196)      | -0.05373***<br>(0.02608) | 0.22383***<br>(0.01576)  | -0.02986*<br>(0.01483)   | 0.00948<br>(0.01483)     | 0.01649<br>(0.01483)     | -0.00265<br>(0.01646)    | -0.02894<br>(0.00658)    | -0.02894<br>(0.00658)    | 0.01705***<br>(0.00488)  | -0.02894<br>(0.00658)    | -0.02894<br>(0.00658)    |                         |
| y5                            | -0.00870**<br>(0.00427)  | -0.03523***<br>(0.01064) | -0.00463***<br>(0.00217) | -0.00069<br>(0.00146)    | -0.00502<br>(0.00387)    | -0.00081<br>(0.00125)    | -0.01600***<br>(0.00607) | -0.00532***<br>(0.00118) | -0.00269**<br>(0.00146)  | -0.00163*<br>(0.00206)   | -0.0071***<br>(0.01591)       | 0.21263***<br>(0.02661)  | -0.02709**<br>(0.01583)  | -0.00412<br>(0.01473)    | 0.00419<br>(0.01672)     | -0.00419<br>(0.00662)    | -0.02974<br>(0.01666)    | 0.02110***<br>(0.00210)  | -0.02974<br>(0.00662)    | -0.02974<br>(0.00662)    | -0.02974<br>(0.00662)    | -0.02974<br>(0.00662)    |                         |
| y6                            | -0.00688<br>(0.00426)    | -0.02874***<br>(0.01072) | -0.00397*<br>(0.00227)   | 0.00003<br>(0.00144)     | -0.00689**<br>(0.00357)  | -0.00055<br>(0.00227)    | -0.01584***<br>(0.00719) | -0.00509***<br>(0.00114) | -0.00265**<br>(0.00144)  | -0.00116<br>(0.00087)    | -0.00439***<br>(0.00208)      | 0.22166***<br>(0.01594)  | -0.04344***<br>(0.01594) | 0.00139<br>(0.01496)     | 0.00833<br>(0.01654)     | -0.00219<br>(0.00663)    | -0.03054*<br>(0.00663)   | 0.01780***<br>(0.00478)  | -0.03054*<br>(0.00663)   | -0.03054*<br>(0.00663)   | -0.03054*<br>(0.00663)   | -0.03054*<br>(0.00663)   |                         |
| y7                            | -0.00543<br>(0.00425)    | -0.03298***<br>(0.01070) | -0.00522**<br>(0.00220)  | -0.00138<br>(0.00140)    | -0.00851***<br>(0.00369) | -0.00054<br>(0.00124)    | -0.01903***<br>(0.00605) | -0.00499***<br>(0.00176) | -0.00300***<br>(0.00114) | -0.00113<br>(0.00084)    | -0.00692***<br>(0.01599)      | 0.19364***<br>(0.01583)  | -0.02574<br>(0.01496)    | 0.00440<br>(0.01448)     | 0.02475<br>(0.00653)     | 0.00204<br>(0.00653)     | -0.03038*<br>(0.00653)   | 0.02151***<br>(0.00653)  | -0.03038*<br>(0.00653)   | -0.03038*<br>(0.00653)   | -0.03038*<br>(0.00653)   | -0.03038*<br>(0.00653)   |                         |
| y                             |                          |                          |                          |                          |                          |                          |                          |                          |                          |                          |                               |                          |                          |                          |                          |                          |                          |                          |                          |                          |                          |                          |                         |
